# Supplementary material for: The Burden and Risk Factors of Chronic Obstructive Pulmonary Disease (COPD) in Asia and Its Countries from 1990 to 2021: A Systematic Analysis Based on the 2021 Global Burden of Disease Study
Source: Research Square preprint supplement (doi:10.21203/rs.3.rs-6862863/v1), 2025-07-18
Supplement: Supplementary file 1 [file 8b8a0ce5b10f22b5110724ac.xlsx]

## Sheet: S1
Table 1 S1： The global disease burden of chronic obstructive pulmonary disease (COPD) in 2021.
	Deaths (95% uncertainty interval)				Incidence (95% uncertainty interval)				DALYs (95% uncertainty interval)
	Counts (2021)	Age- standardised rates per 100,000 (2021)	Rate change in Age_x0002_standardised rates, 1990–2021		Counts (2021)	Age- standardised rates per 100,000 (2021)	Rate change in Age_x0002_standardised rates, 1990–2021		Counts (2021)	Age- standardised rates per 100,000 (2021)	Rate change in Age_x0002_standardised rates, 1990–2021
Global	3719937	45.22	-0.37		16895445	197.37	-0.02		79779695	940.66	-0.37
	(3,347,912-4,084,218)	(40.61-49.70)	(-0.43 to -0.28)		(15,471,347-18,335,691)	(181.65-213.42)	(-0.05 to -0.01)		(74,026,373-86,011,406)	(871.48-1014.59)	(-0.42 to -0.29)
High SDI	469239	19.44	-0.24		3738605	187.56	0.0181		10197033	471.22	-0.2
	（410,389-501,053）	(17.26-20.66)	(-0.27 to -0.21)		(3,455,741-4,029,190)	(174.46-200.88)	(-0.01 to 0.05)		(9,399,335-10,811,523)	(437.45-498.84)	(-0.22 to -0.18)
High-middle SDI	689449	35.91	-0.55		3572747	184.66	-0.09		13439404	691.14	-0.54
	(591,991-781,694)	(30.78-40.69)	(- 0.62 to -0.47)		(3,232,638-3,922,373)	(168.23-202.63)	(- 0.12 to -0.06)		(12,068,466-15,035,540)	(621.83-772.74)	(- 0.60 to -0.47)
Middle SDI	1293660	57.45	-0.54		5330088	203.26	-0.07		26679162	1076.67	-0.54
	(1,122,166-1,476,737)	(49.59-65.43)	(-0.60 to -0.44)		(4,819,505-5,856,107)	(185.60-221.23)	(-0.10 to -0.04)		（23,958,688-29,735,634)	(963.62-1201.24)	(-0.60 to -0.46)
Low-middle SDI	999762	84.76	-0.07		3238338	227.24	-0.01		22727338	1707.9	-0.13
	(898,211-1,104,472)	(75.80-93.78)	(- 0.20 to 0.16)		(2,999,595-3,483,042)	(212.55-242.96)	(-0.03 to 0.01)		(20,885,632-24,793,577)	(1558.88-1865.11)	(- 0.24 to 0.07)
Low SDI	266004	70.7	-0.09		1003161	188.01	0.0235		6693611	1457.94	-0.13
	(237,375-300,955)	(63.35-79.76)	(-0.20 to 0.12)		(931,214-1,080,774)	(174.28-201.15)	(-0.002 to 0.05)		(6,035,072-7,482,882)	(1318.76-1617.05)	(- 0.22 to 0.05)
Latin America and Caribbean
Andean Latin America	7390	13.4	-0.31		76153	129.53	0.14		149985	261.42	-0.3
	(6,023-8,970)	(10.93-16.29)	(- 0.44 to -0.14)		（67,002-85,720）	（113.95-146.07）	(0.03 to 0.28)		(127,861-176,080)	(222.30-306.62)	(- 0.41 to -0.16)
Caribbean	10847	19.85	0.07		73259	136.21	0.22		237302	439.53	0.11
	（9,546-12,274）	（17.47-22.49）	(- 0.05 to 0.22)		(66,093-80,323)	(122.61-149.19)	(0.15 to 0.30)		(209,888-269,405)	(388.88-499.30)	(- 0.01 to 0.25)
Southern Latin America	20619	22.53	1.15		104102	120.12	-4e-05		386637	436.03	-0.21
	(18,764-22,039)	(20.53-24.07)	(0.83 to 1.48)		(939,191-115,164)	(107.77-132.55)	(-0.08 to 0.10)		（359,705-409,516）	（405.72-461.73）	(-0.26 to -0.17)
Central Latin America	62381	26.92	-0.25		444187	180.32	0.12		1233672	512.35	-0.22
	(54,937-68,713)	(23.70-29.64)	(-0.31 to -0.18)		(404,528-485,440)	（164.59-196.89）	(0.08 to 0.17)		(1,115,698-1,349,665)	(462.65-560.08)	（-0.28 to -0.16）
Tropical Latin America	64662	26.32	-0.41		491866	193.37	-0.04		1402591	554.73	-0.37
	(57,769-68,635)	(23.44-27.99)	(-0.44 to -0.38 )		(437,763-549,169)	(171.91-215.04)	(-0.08 to -0.01)		(1,301,693-1,479,540)	(513.83-585.11)	（-0.40 to -0.35)
Central Europe, eastern Europe, and central Asia
Central Asia	14472	21.27	-0.41		133302	166.1	0.003		385342	498.6	-0.39
	(12,972-16,004)	(19.12-23.46)	(-0.47 to -0.35)		(118,936-148,131)	(148.28-184.13)	( -0.04 to 0.06)		(348,373-424,298)	(452.01-546.10)	( -0.44 to -0.32)
Central Europe	37944	16.03	-0.48		358922	170.85	0.06		915005	413.12	-0.39
	(34,727-40,752)	(14.70-17.22)	( -0.52 to -0.44)		(320,214-398,311)	(154.02-187.89)	(0.01 to 0.11)		(846,947-983,685)	(382.55-444.56)	( -0.43 to -0.36)
Eastern Europe	42153	11.72	-0.67		466293	141.15	-0.17		1120458	324.42	-0.59
	(38,786-45,390)	(10.79-12.62)	(-0.70 to -0.65)		(401,442-528,518)	(122.66-159.15)	(-0.21 to -0.14)		(1,038,544-1,207,862)	(301.04-350.10)	(-0.62 to -0.56)
High-income Australasia	11515	18.89	-0.36		64995	125.74	-0.21		212256	376.2	-0.38
	(10,073-12,491)	(16.16-20.42)	(-0.41 to -0.31)		(57,949-73,958)	(112.75-142.68)	( -0.26 to -0.12)		(192,365-226,340)	(343.09-400.39)	(-0.42 to -0.34)
High-income
High-income North America	213211	29.89	0.14		1457541	234.36	0.12		4946483	736.05	0.05
	(185,697-226,185)	(26.20-31.63)	(0.08 to 0.17)		(1,375,581-1,529,937)	(222.40-245.03)	(0.06 to 0.19)		(4,577,693-5,222,007)	(685.79-776.50)	( 0.01 to 0.07)
High-income Asia Pacific	44251	6.68	-0.53		586743	125.19	-0.09		958532	182.14	-0.42
	(36,742-49,170)	(5.70-7.37)	( -0.56 to -0.48)		(507,297-672,277)	(110.04-141.17)	(-0.12 to -0.05 )		(841,286-1,065,149)	(162.64-202.95)	(- 0.45 to -0.38)
Western Europe	205393	17.82	-0.28		1696122	188.71	-0.02		3886179	390.81	-0.25
	(177,939-219,862)	(15.74-18.92)	(-0.32 to -0.25)		(1,559,293-1,848,142)	(173.96-204.91)	(-0.05 to 0.01)		(3,551,749-4,135,317)	(361.46-415.88)	(-0.27 to -0.23)
North Africa and Middle East
North Africa and Middle East	92680	26.37	-0.27		827235	179.46	0.23		2534741	599.18	-0.25
	(82,194-103,229)	(23.19-29.31)	(-0.37 to -0.05)		(739,140-922,750)	(160.40-199.32)	(0.18 to 0.27)		(2,307,239-2,795,709)	(546.07-658.22)	( -0.34 to -0.08)
South Asia
South Asia	1229610	101.63	-0.11		3779866	258.26	-0.05		28009599	2049.22	-0.15
	(1,104,444-1,381,284)	(90.55-114.34)	(-0.25 to 0.15)		(3,513,162-4,030,885)	(242.49-273.76)	(-0.07 to -0.03)		(25,404,007-30,942,201)	(1862.71-2268.73)	(-0.27 to 0.06)
Sub-Saharan Africa
Central Sub-Saharan Africa	16405	42.82	-0.18		88281	149.24	0.06		496006	975.91	-0.15
	(11,385-24,014)	(29.63-65.02)	(-0.37 to 0.06)		(79,298-98,784)	(133.76-166.02)	(0.01 to 0.12)		(367,406-659,995)	(720.50-1344.93)	(- 0.33 to 0.05)
Eastern Sub-Saharan Africa	38601	29.91	-0.29		230278	116.67	-0.004		1190523	713.24	-0.26
	(31,589-45,499)	(24.41-35.14)	(- 0.39 to -0.15)		(206,005-256,110)	(103.99-129.63)	(- 0.05 to 0.04)		(990,108-1,364,079)	(593.00-816.07)	(- 0.35 to -0.13)
Southern Sub-Saharan Africa	16579	34.78	-0.07		91911	157.09	-0.002		480021	864.13	-0.04
	(15,268-17,781)	(31.93-37.34)	(- 0.22 to 0.04)		(81,635-102,392)	(138.99-175.94)	(-0.04 to 0.03)		(444,990-518,791)	(800.37-929.92)	(- 0.14 to 0.05)
Western Sub-Saharan Africa	33075	22.07	-0.23		268280	116.95	0.12		1125637	567.27	-0.17
	(29,017-37,675)	(19.45-25.05)	(-0.34 to -0.02)		(238,671-297,722)	(102.97-130.95)	(0.09 to 0.16)		(1,009,837-1,263,286)	(510.78-631.22)	(- 0.28 to -0.0001)
Southeast Asia, east Asia, and Oceania
East Asia	1323441	72.2	-0.68		4567271	214.45	-0.2		24391744	1217.69	-0.68
	(1,082,508-1,574,211)	(59.32-85.26)	(- 0.74 to -0.60)		(4,133,512-5,000,602)	(197.24-233.32)	( -0.25 to -0.17)		(20,762,410-28,628,224)	(1043.87-1422.79)	(-0.74 to -0.60)
Oceania	6219	118.21	-0.18		18087	243.27	-0.04		158393	2351.49	-0.19
	(4,984-7,672)	(96.32-144.59)	(-0.35 to 0.06)		(16,743-19,481)	(229.23-258.09)	(- 0.07 to -0.02)		(127,993-193,145)	(1931.26-2854.06)	(- 0.37 to 0.06)
South-East Asia	1353298	90.37	-0.15		4269776	238.59	-0.04		30768540	1825.95	-0.18
	(1,222,174-1,506,908)	(80.91-100.75)	(-0.28 to 0.10)		(3,955,588-4,583,441)	(223.21-254.28)	(-0.06 to -0.02)		(28,102,660-33,611,812)	(1665.62-1999.94)	(- 0.29 to 0.03)
Table 1: incident cases, death cases and DALYs for COPD in 2021 for both sexes and rate change of age-standardised rates by Global Burden of Disease (GBD).

## Sheet: S2
Table 1 S2 The Risk Factors of COPD ,in 2021
measure_name	location_id	location_name	sex_id	sex_name	age_id	age_name	cause_id	cause_name	rei_id	rei_name	metric_id	metric_name	year	val	upper	lower
Deaths	1	Global	3	Both	27	Age-standardized	509	Chronic obstructive pulmonary disease	99	Smoking	3	Rate	2021	16.121	19.2945	12.6821
Deaths	1	Global	3	Both	27	Age-standardized	509	Chronic obstructive pulmonary disease	100	Secondhand smoke	3	Rate	2021	3.24219	5.29037	1.28816
Deaths	1	Global	3	Both	27	Age-standardized	509	Chronic obstructive pulmonary disease	129	Occupational particulate matter, gases, and fumes	3	Rate	2021	7.03451	8.66598	5.64466
Deaths	1	Global	3	Both	27	Age-standardized	509	Chronic obstructive pulmonary disease	337	High temperature	3	Rate	2021	0.448801	1.23933	-0.0925
Deaths	1	Global	3	Both	27	Age-standardized	509	Chronic obstructive pulmonary disease	88	Ambient ozone pollution	3	Rate	2021	5.91225	10.1085	1.296
Deaths	1	Global	3	Both	27	Age-standardized	509	Chronic obstructive pulmonary disease	380	Particulate matter pollution	3	Rate	2021	18.5144	23.1335	14.6389
Deaths	1	Global	3	Both	27	Age-standardized	509	Chronic obstructive pulmonary disease	338	Low temperature	3	Rate	2021	3.68797	4.4779	2.97368
Deaths	5	East Asia	3	Both	27	Age-standardized	509	Chronic obstructive pulmonary disease	99	Smoking	3	Rate	2021	30.5596	38.4802	22.679
Deaths	5	East Asia	3	Both	27	Age-standardized	509	Chronic obstructive pulmonary disease	100	Secondhand smoke	3	Rate	2021	6.6587	11.0175	2.68389
Deaths	9	Southeast Asia	3	Both	27	Age-standardized	509	Chronic obstructive pulmonary disease	99	Smoking	3	Rate	2021	17.1177	20.6317	13.8437
Deaths	32	Central Asia	3	Both	27	Age-standardized	509	Chronic obstructive pulmonary disease	100	Secondhand smoke	3	Rate	2021	1.51994	2.48482	0.595416
Deaths	9	Southeast Asia	3	Both	27	Age-standardized	509	Chronic obstructive pulmonary disease	100	Secondhand smoke	3	Rate	2021	3.35775	5.48957	1.29038
Deaths	21	Oceania	3	Both	27	Age-standardized	509	Chronic obstructive pulmonary disease	338	Low temperature	3	Rate	2021	6.24075	7.76498	4.81013
Deaths	5	East Asia	3	Both	27	Age-standardized	509	Chronic obstructive pulmonary disease	338	Low temperature	3	Rate	2021	8.3039	10.129	6.69812
Deaths	5	East Asia	3	Both	27	Age-standardized	509	Chronic obstructive pulmonary disease	88	Ambient ozone pollution	3	Rate	2021	7.15781	12.8983	1.50042
Deaths	5	East Asia	3	Both	27	Age-standardized	509	Chronic obstructive pulmonary disease	129	Occupational particulate matter, gases, and fumes	3	Rate	2021	13.0283	16.9136	9.40313
Deaths	21	Oceania	3	Both	27	Age-standardized	509	Chronic obstructive pulmonary disease	337	High temperature	3	Rate	2021	-0.05257	0.085374	-0.19914
Deaths	21	Oceania	3	Both	27	Age-standardized	509	Chronic obstructive pulmonary disease	100	Secondhand smoke	3	Rate	2021	12.8578	21.0928	5.15709
Deaths	21	Oceania	3	Both	27	Age-standardized	509	Chronic obstructive pulmonary disease	380	Particulate matter pollution	3	Rate	2021	75.799	96.0406	55.5528
Deaths	42	Central Europe	3	Both	27	Age-standardized	509	Chronic obstructive pulmonary disease	100	Secondhand smoke	3	Rate	2021	0.981121	1.63917	0.390858
Deaths	32	Central Asia	3	Both	27	Age-standardized	509	Chronic obstructive pulmonary disease	99	Smoking	3	Rate	2021	6.60831	8.0393	5.27987
Deaths	21	Oceania	3	Both	27	Age-standardized	509	Chronic obstructive pulmonary disease	88	Ambient ozone pollution	3	Rate	2021	0.279985	0.536275	0.057164
Deaths	9	Southeast Asia	3	Both	27	Age-standardized	509	Chronic obstructive pulmonary disease	129	Occupational particulate matter, gases, and fumes	3	Rate	2021	7.16715	8.71524	5.73142
Deaths	32	Central Asia	3	Both	27	Age-standardized	509	Chronic obstructive pulmonary disease	129	Occupational particulate matter, gases, and fumes	3	Rate	2021	3.05488	3.736	2.45842
Deaths	32	Central Asia	3	Both	27	Age-standardized	509	Chronic obstructive pulmonary disease	337	High temperature	3	Rate	2021	0.167757	0.458834	-0.08821
Deaths	9	Southeast Asia	3	Both	27	Age-standardized	509	Chronic obstructive pulmonary disease	338	Low temperature	3	Rate	2021	0.545899	0.807482	0.302589
Deaths	9	Southeast Asia	3	Both	27	Age-standardized	509	Chronic obstructive pulmonary disease	88	Ambient ozone pollution	3	Rate	2021	2.67379	4.8267	0.541016
Deaths	5	East Asia	3	Both	27	Age-standardized	509	Chronic obstructive pulmonary disease	337	High temperature	3	Rate	2021	0.398131	1.39397	-0.31026
Deaths	32	Central Asia	3	Both	27	Age-standardized	509	Chronic obstructive pulmonary disease	338	Low temperature	3	Rate	2021	2.65363	3.02903	2.28615
Deaths	32	Central Asia	3	Both	27	Age-standardized	509	Chronic obstructive pulmonary disease	380	Particulate matter pollution	3	Rate	2021	5.72448	7.62673	4.14158
Deaths	5	East Asia	3	Both	27	Age-standardized	509	Chronic obstructive pulmonary disease	380	Particulate matter pollution	3	Rate	2021	28.2064	39.6716	20.2447
Deaths	9	Southeast Asia	3	Both	27	Age-standardized	509	Chronic obstructive pulmonary disease	337	High temperature	3	Rate	2021	0.290865	0.526875	0.146057
Deaths	21	Oceania	3	Both	27	Age-standardized	509	Chronic obstructive pulmonary disease	99	Smoking	3	Rate	2021	24.2313	32.7313	17.4252
Deaths	9	Southeast Asia	3	Both	27	Age-standardized	509	Chronic obstructive pulmonary disease	380	Particulate matter pollution	3	Rate	2021	16.7465	23.4631	11.2928
Deaths	21	Oceania	3	Both	27	Age-standardized	509	Chronic obstructive pulmonary disease	129	Occupational particulate matter, gases, and fumes	3	Rate	2021	12.1894	15.8162	8.88031
Deaths	56	Eastern Europe	3	Both	27	Age-standardized	509	Chronic obstructive pulmonary disease	99	Smoking	3	Rate	2021	4.74093	5.62632	3.86911
Deaths	32	Central Asia	3	Both	27	Age-standardized	509	Chronic obstructive pulmonary disease	88	Ambient ozone pollution	3	Rate	2021	2.22262	4.12793	0.427395
Deaths	56	Eastern Europe	3	Both	27	Age-standardized	509	Chronic obstructive pulmonary disease	129	Occupational particulate matter, gases, and fumes	3	Rate	2021	1.31146	1.6039	1.06002
Deaths	56	Eastern Europe	3	Both	27	Age-standardized	509	Chronic obstructive pulmonary disease	337	High temperature	3	Rate	2021	0.018875	0.081203	-0.04593
Deaths	56	Eastern Europe	3	Both	27	Age-standardized	509	Chronic obstructive pulmonary disease	380	Particulate matter pollution	3	Rate	2021	1.22953	1.81522	0.752797
Deaths	42	Central Europe	3	Both	27	Age-standardized	509	Chronic obstructive pulmonary disease	88	Ambient ozone pollution	3	Rate	2021	1.02467	1.82702	0.222512
Deaths	56	Eastern Europe	3	Both	27	Age-standardized	509	Chronic obstructive pulmonary disease	88	Ambient ozone pollution	3	Rate	2021	0.45748	0.824381	0.092045
Deaths	56	Eastern Europe	3	Both	27	Age-standardized	509	Chronic obstructive pulmonary disease	100	Secondhand smoke	3	Rate	2021	0.54259	0.892665	0.213316
Deaths	42	Central Europe	3	Both	27	Age-standardized	509	Chronic obstructive pulmonary disease	99	Smoking	3	Rate	2021	6.23167	7.58748	4.82764
Deaths	65	High-income Asia Pacific	3	Both	27	Age-standardized	509	Chronic obstructive pulmonary disease	100	Secondhand smoke	3	Rate	2021	0.269653	0.462581	0.103697
Deaths	96	Southern Latin America	3	Both	27	Age-standardized	509	Chronic obstructive pulmonary disease	100	Secondhand smoke	3	Rate	2021	1.35348	2.22031	0.531669
Deaths	56	Eastern Europe	3	Both	27	Age-standardized	509	Chronic obstructive pulmonary disease	338	Low temperature	3	Rate	2021	1.41877	1.61923	1.19833
Deaths	42	Central Europe	3	Both	27	Age-standardized	509	Chronic obstructive pulmonary disease	129	Occupational particulate matter, gases, and fumes	3	Rate	2021	1.69788	2.0687	1.36087
Deaths	65	High-income Asia Pacific	3	Both	27	Age-standardized	509	Chronic obstructive pulmonary disease	99	Smoking	3	Rate	2021	2.67676	3.38084	2.04875
Deaths	65	High-income Asia Pacific	3	Both	27	Age-standardized	509	Chronic obstructive pulmonary disease	88	Ambient ozone pollution	3	Rate	2021	0.779054	1.3789	0.166968
Deaths	73	Western Europe	3	Both	27	Age-standardized	509	Chronic obstructive pulmonary disease	99	Smoking	3	Rate	2021	6.38912	7.89904	4.88434
Deaths	42	Central Europe	3	Both	27	Age-standardized	509	Chronic obstructive pulmonary disease	337	High temperature	3	Rate	2021	0.036902	0.196137	-0.08927
Deaths	42	Central Europe	3	Both	27	Age-standardized	509	Chronic obstructive pulmonary disease	338	Low temperature	3	Rate	2021	2.13041	2.37577	1.86508
Deaths	42	Central Europe	3	Both	27	Age-standardized	509	Chronic obstructive pulmonary disease	380	Particulate matter pollution	3	Rate	2021	2.55221	3.92973	1.87812
Deaths	73	Western Europe	3	Both	27	Age-standardized	509	Chronic obstructive pulmonary disease	100	Secondhand smoke	3	Rate	2021	0.560678	0.930721	0.223083
Deaths	104	Caribbean	3	Both	27	Age-standardized	509	Chronic obstructive pulmonary disease	100	Secondhand smoke	3	Rate	2021	0.927658	1.57129	0.36646
Deaths	96	Southern Latin America	3	Both	27	Age-standardized	509	Chronic obstructive pulmonary disease	129	Occupational particulate matter, gases, and fumes	3	Rate	2021	2.49558	3.05978	1.96295
Deaths	73	Western Europe	3	Both	27	Age-standardized	509	Chronic obstructive pulmonary disease	338	Low temperature	3	Rate	2021	2.32786	2.6553	2.03302
Deaths	96	Southern Latin America	3	Both	27	Age-standardized	509	Chronic obstructive pulmonary disease	99	Smoking	3	Rate	2021	5.90663	7.50168	4.37207
Deaths	73	Western Europe	3	Both	27	Age-standardized	509	Chronic obstructive pulmonary disease	129	Occupational particulate matter, gases, and fumes	3	Rate	2021	1.47988	1.85626	1.13886
Deaths	65	High-income Asia Pacific	3	Both	27	Age-standardized	509	Chronic obstructive pulmonary disease	338	Low temperature	3	Rate	2021	0.827852	0.936704	0.697475
Deaths	100	High-income North America	3	Both	27	Age-standardized	509	Chronic obstructive pulmonary disease	338	Low temperature	3	Rate	2021	3.33095	3.67747	2.86841
Deaths	70	Australasia	3	Both	27	Age-standardized	509	Chronic obstructive pulmonary disease	99	Smoking	3	Rate	2021	4.59643	6.03312	3.35128
Deaths	100	High-income North America	3	Both	27	Age-standardized	509	Chronic obstructive pulmonary disease	337	High temperature	3	Rate	2021	0.139875	0.618594	-0.18406
Deaths	70	Australasia	3	Both	27	Age-standardized	509	Chronic obstructive pulmonary disease	129	Occupational particulate matter, gases, and fumes	3	Rate	2021	1.52411	1.89954	1.15902
Deaths	70	Australasia	3	Both	27	Age-standardized	509	Chronic obstructive pulmonary disease	100	Secondhand smoke	3	Rate	2021	0.495465	0.842763	0.191597
Deaths	96	Southern Latin America	3	Both	27	Age-standardized	509	Chronic obstructive pulmonary disease	337	High temperature	3	Rate	2021	0.014772	0.107577	-0.05052
Deaths	73	Western Europe	3	Both	27	Age-standardized	509	Chronic obstructive pulmonary disease	337	High temperature	3	Rate	2021	0.010284	0.06082	-0.03395
Deaths	96	Southern Latin America	3	Both	27	Age-standardized	509	Chronic obstructive pulmonary disease	88	Ambient ozone pollution	3	Rate	2021	0.837282	1.67869	0.164889
Deaths	70	Australasia	3	Both	27	Age-standardized	509	Chronic obstructive pulmonary disease	88	Ambient ozone pollution	3	Rate	2021	0.32385	0.693425	0.056064
Deaths	100	High-income North America	3	Both	27	Age-standardized	509	Chronic obstructive pulmonary disease	380	Particulate matter pollution	3	Rate	2021	1.09067	1.73081	0.519339
Deaths	96	Southern Latin America	3	Both	27	Age-standardized	509	Chronic obstructive pulmonary disease	338	Low temperature	3	Rate	2021	2.64268	2.91258	2.33569
Deaths	73	Western Europe	3	Both	27	Age-standardized	509	Chronic obstructive pulmonary disease	88	Ambient ozone pollution	3	Rate	2021	1.28802	2.26132	0.284489
Deaths	65	High-income Asia Pacific	3	Both	27	Age-standardized	509	Chronic obstructive pulmonary disease	129	Occupational particulate matter, gases, and fumes	3	Rate	2021	0.734793	0.987038	0.514152
Deaths	96	Southern Latin America	3	Both	27	Age-standardized	509	Chronic obstructive pulmonary disease	380	Particulate matter pollution	3	Rate	2021	3.05389	4.85222	1.73369
Deaths	73	Western Europe	3	Both	27	Age-standardized	509	Chronic obstructive pulmonary disease	380	Particulate matter pollution	3	Rate	2021	1.36446	1.84133	0.918611
Deaths	70	Australasia	3	Both	27	Age-standardized	509	Chronic obstructive pulmonary disease	338	Low temperature	3	Rate	2021	2.08805	2.36622	1.77282
Deaths	100	High-income North America	3	Both	27	Age-standardized	509	Chronic obstructive pulmonary disease	88	Ambient ozone pollution	3	Rate	2021	2.06776	3.58631	0.456437
Deaths	134	Tropical Latin America	3	Both	27	Age-standardized	509	Chronic obstructive pulmonary disease	100	Secondhand smoke	3	Rate	2021	1.28335	2.1319	0.494707
Deaths	70	Australasia	3	Both	27	Age-standardized	509	Chronic obstructive pulmonary disease	337	High temperature	3	Rate	2021	0.014493	0.083592	-0.02995
Deaths	120	Andean Latin America	3	Both	27	Age-standardized	509	Chronic obstructive pulmonary disease	99	Smoking	3	Rate	2021	2.15597	2.9012	1.53123
Deaths	120	Andean Latin America	3	Both	27	Age-standardized	509	Chronic obstructive pulmonary disease	88	Ambient ozone pollution	3	Rate	2021	0.629514	1.22063	0.127791
Deaths	104	Caribbean	3	Both	27	Age-standardized	509	Chronic obstructive pulmonary disease	88	Ambient ozone pollution	3	Rate	2021	0.582645	1.13487	0.106082
Deaths	124	Central Latin America	3	Both	27	Age-standardized	509	Chronic obstructive pulmonary disease	88	Ambient ozone pollution	3	Rate	2021	1.41803	2.5521	0.315876
Deaths	65	High-income Asia Pacific	3	Both	27	Age-standardized	509	Chronic obstructive pulmonary disease	337	High temperature	3	Rate	2021	0.015783	0.078285	-0.03437
Deaths	70	Australasia	3	Both	27	Age-standardized	509	Chronic obstructive pulmonary disease	380	Particulate matter pollution	3	Rate	2021	1.10069	1.58643	0.638459
Deaths	120	Andean Latin America	3	Both	27	Age-standardized	509	Chronic obstructive pulmonary disease	100	Secondhand smoke	3	Rate	2021	0.388306	0.666023	0.144641
Deaths	120	Andean Latin America	3	Both	27	Age-standardized	509	Chronic obstructive pulmonary disease	129	Occupational particulate matter, gases, and fumes	3	Rate	2021	1.80131	2.40232	1.25565
Deaths	138	North Africa and Middle East	3	Both	27	Age-standardized	509	Chronic obstructive pulmonary disease	100	Secondhand smoke	3	Rate	2021	2.10576	3.45376	0.828614
Deaths	124	Central Latin America	3	Both	27	Age-standardized	509	Chronic obstructive pulmonary disease	99	Smoking	3	Rate	2021	5.07782	6.44848	3.79622
Deaths	100	High-income North America	3	Both	27	Age-standardized	509	Chronic obstructive pulmonary disease	99	Smoking	3	Rate	2021	11.3247	14.2671	8.49873
Deaths	104	Caribbean	3	Both	27	Age-standardized	509	Chronic obstructive pulmonary disease	99	Smoking	3	Rate	2021	5.68825	7.17336	4.25181
Deaths	120	Andean Latin America	3	Both	27	Age-standardized	509	Chronic obstructive pulmonary disease	338	Low temperature	3	Rate	2021	1.15845	1.44826	0.887582
Deaths	65	High-income Asia Pacific	3	Both	27	Age-standardized	509	Chronic obstructive pulmonary disease	380	Particulate matter pollution	3	Rate	2021	0.909253	1.38074	0.517973
Deaths	104	Caribbean	3	Both	27	Age-standardized	509	Chronic obstructive pulmonary disease	129	Occupational particulate matter, gases, and fumes	3	Rate	2021	2.29468	2.89626	1.80203
Deaths	124	Central Latin America	3	Both	27	Age-standardized	509	Chronic obstructive pulmonary disease	100	Secondhand smoke	3	Rate	2021	1.21706	1.98815	0.461432
Deaths	100	High-income North America	3	Both	27	Age-standardized	509	Chronic obstructive pulmonary disease	129	Occupational particulate matter, gases, and fumes	3	Rate	2021	2.47957	3.00876	1.97296
Deaths	124	Central Latin America	3	Both	27	Age-standardized	509	Chronic obstructive pulmonary disease	129	Occupational particulate matter, gases, and fumes	3	Rate	2021	3.39517	4.22537	2.55899
Deaths	100	High-income North America	3	Both	27	Age-standardized	509	Chronic obstructive pulmonary disease	100	Secondhand smoke	3	Rate	2021	0.731238	1.21004	0.283715
Deaths	120	Andean Latin America	3	Both	27	Age-standardized	509	Chronic obstructive pulmonary disease	337	High temperature	3	Rate	2021	-0.00352	0.018071	-0.01885
Deaths	104	Caribbean	3	Both	27	Age-standardized	509	Chronic obstructive pulmonary disease	337	High temperature	3	Rate	2021	-0.00543	0.026698	-0.02321
Deaths	124	Central Latin America	3	Both	27	Age-standardized	509	Chronic obstructive pulmonary disease	338	Low temperature	3	Rate	2021	1.81229	2.06185	1.50078
Deaths	104	Caribbean	3	Both	27	Age-standardized	509	Chronic obstructive pulmonary disease	338	Low temperature	3	Rate	2021	0.154381	0.234049	0.0673
Deaths	159	South Asia	3	Both	27	Age-standardized	509	Chronic obstructive pulmonary disease	88	Ambient ozone pollution	3	Rate	2021	22.49	38.0601	4.90545
Deaths	174	Eastern Sub-Saharan Africa	3	Both	27	Age-standardized	509	Chronic obstructive pulmonary disease	100	Secondhand smoke	3	Rate	2021	0.966582	1.69738	0.3801
Deaths	159	South Asia	3	Both	27	Age-standardized	509	Chronic obstructive pulmonary disease	100	Secondhand smoke	3	Rate	2021	7.48356	12.3961	2.86957
Deaths	120	Andean Latin America	3	Both	27	Age-standardized	509	Chronic obstructive pulmonary disease	380	Particulate matter pollution	3	Rate	2021	3.56224	5.37044	2.19426
Deaths	167	Central Sub-Saharan Africa	3	Both	27	Age-standardized	509	Chronic obstructive pulmonary disease	100	Secondhand smoke	3	Rate	2021	1.43951	2.89043	0.536113
Deaths	124	Central Latin America	3	Both	27	Age-standardized	509	Chronic obstructive pulmonary disease	337	High temperature	3	Rate	2021	0.054596	0.150524	-0.00883
Deaths	134	Tropical Latin America	3	Both	27	Age-standardized	509	Chronic obstructive pulmonary disease	99	Smoking	3	Rate	2021	8.12425	10.3705	6.07799
Deaths	104	Caribbean	3	Both	27	Age-standardized	509	Chronic obstructive pulmonary disease	380	Particulate matter pollution	3	Rate	2021	5.21162	7.39623	3.30849
Deaths	134	Tropical Latin America	3	Both	27	Age-standardized	509	Chronic obstructive pulmonary disease	88	Ambient ozone pollution	3	Rate	2021	1.90789	3.37659	0.422023
Deaths	138	North Africa and Middle East	3	Both	27	Age-standardized	509	Chronic obstructive pulmonary disease	88	Ambient ozone pollution	3	Rate	2021	3.49121	6.05874	0.750154
Deaths	159	South Asia	3	Both	27	Age-standardized	509	Chronic obstructive pulmonary disease	99	Smoking	3	Rate	2021	30.2641	37.2283	23.4765
Deaths	138	North Africa and Middle East	3	Both	27	Age-standardized	509	Chronic obstructive pulmonary disease	99	Smoking	3	Rate	2021	8.78578	10.7197	6.71382
Deaths	167	Central Sub-Saharan Africa	3	Both	27	Age-standardized	509	Chronic obstructive pulmonary disease	99	Smoking	3	Rate	2021	4.5657	6.36889	3.13435
Deaths	124	Central Latin America	3	Both	27	Age-standardized	509	Chronic obstructive pulmonary disease	380	Particulate matter pollution	3	Rate	2021	4.62304	7.45061	3.03556
Deaths	134	Tropical Latin America	3	Both	27	Age-standardized	509	Chronic obstructive pulmonary disease	129	Occupational particulate matter, gases, and fumes	3	Rate	2021	3.41416	4.09741	2.72264
Deaths	199	Western Sub-Saharan Africa	3	Both	27	Age-standardized	509	Chronic obstructive pulmonary disease	100	Secondhand smoke	3	Rate	2021	0.746294	1.2794	0.287451
Deaths	138	North Africa and Middle East	3	Both	27	Age-standardized	509	Chronic obstructive pulmonary disease	129	Occupational particulate matter, gases, and fumes	3	Rate	2021	3.05219	3.84357	2.34294
Deaths	174	Eastern Sub-Saharan Africa	3	Both	27	Age-standardized	509	Chronic obstructive pulmonary disease	88	Ambient ozone pollution	3	Rate	2021	2.34894	4.35433	0.462585
Deaths	192	Southern Sub-Saharan Africa	3	Both	27	Age-standardized	509	Chronic obstructive pulmonary disease	100	Secondhand smoke	3	Rate	2021	2.26766	3.68505	0.904653
Deaths	134	Tropical Latin America	3	Both	27	Age-standardized	509	Chronic obstructive pulmonary disease	338	Low temperature	3	Rate	2021	1.19544	1.49199	0.88634
Deaths	174	Eastern Sub-Saharan Africa	3	Both	27	Age-standardized	509	Chronic obstructive pulmonary disease	99	Smoking	3	Rate	2021	4.87663	6.35723	3.57207
Deaths	44635	High SDI	3	Both	27	Age-standardized	509	Chronic obstructive pulmonary disease	100	Secondhand smoke	3	Rate	2021	0.639816	1.05068	0.254268
Deaths	138	North Africa and Middle East	3	Both	27	Age-standardized	509	Chronic obstructive pulmonary disease	337	High temperature	3	Rate	2021	0.475431	1.19516	-0.02373
Deaths	134	Tropical Latin America	3	Both	27	Age-standardized	509	Chronic obstructive pulmonary disease	337	High temperature	3	Rate	2021	#######	0.098175	-0.04629
Deaths	159	South Asia	3	Both	27	Age-standardized	509	Chronic obstructive pulmonary disease	338	Low temperature	3	Rate	2021	4.24624	7.04638	1.61625
Deaths	167	Central Sub-Saharan Africa	3	Both	27	Age-standardized	509	Chronic obstructive pulmonary disease	338	Low temperature	3	Rate	2021	0.884792	1.40957	0.536702
Deaths	44637	Low SDI	3	Both	27	Age-standardized	509	Chronic obstructive pulmonary disease	100	Secondhand smoke	3	Rate	2021	4.40549	7.27466	1.69664
Deaths	167	Central Sub-Saharan Africa	3	Both	27	Age-standardized	509	Chronic obstructive pulmonary disease	129	Occupational particulate matter, gases, and fumes	3	Rate	2021	7.61456	11.6859	5.1242
Deaths	138	North Africa and Middle East	3	Both	27	Age-standardized	509	Chronic obstructive pulmonary disease	338	Low temperature	3	Rate	2021	2.65097	3.14247	2.14476
Deaths	44634	High-middle SDI	3	Both	27	Age-standardized	509	Chronic obstructive pulmonary disease	100	Secondhand smoke	3	Rate	2021	2.88728	4.799	1.1604
Deaths	167	Central Sub-Saharan Africa	3	Both	27	Age-standardized	509	Chronic obstructive pulmonary disease	88	Ambient ozone pollution	3	Rate	2021	4.69739	9.32914	0.801736
Deaths	138	North Africa and Middle East	3	Both	27	Age-standardized	509	Chronic obstructive pulmonary disease	380	Particulate matter pollution	3	Rate	2021	8.07389	9.78662	6.47027
Deaths	44639	Middle SDI	3	Both	27	Age-standardized	509	Chronic obstructive pulmonary disease	100	Secondhand smoke	3	Rate	2021	4.71887	7.79568	1.90212
Deaths	134	Tropical Latin America	3	Both	27	Age-standardized	509	Chronic obstructive pulmonary disease	380	Particulate matter pollution	3	Rate	2021	3.29666	5.35379	1.7539
Deaths	44636	Low-middle SDI	3	Both	27	Age-standardized	509	Chronic obstructive pulmonary disease	100	Secondhand smoke	3	Rate	2021	6.38676	10.5581	2.52129
Deaths	159	South Asia	3	Both	27	Age-standardized	509	Chronic obstructive pulmonary disease	129	Occupational particulate matter, gases, and fumes	3	Rate	2021	15.6001	19.4392	12.5151
Deaths	192	Southern Sub-Saharan Africa	3	Both	27	Age-standardized	509	Chronic obstructive pulmonary disease	88	Ambient ozone pollution	3	Rate	2021	2.19301	3.87779	0.467968
Deaths	192	Southern Sub-Saharan Africa	3	Both	27	Age-standardized	509	Chronic obstructive pulmonary disease	99	Smoking	3	Rate	2021	9.06364	11.3992	7.02303
Deaths	174	Eastern Sub-Saharan Africa	3	Both	27	Age-standardized	509	Chronic obstructive pulmonary disease	129	Occupational particulate matter, gases, and fumes	3	Rate	2021	5.95279	7.40062	4.50372
Deaths	44636	Low-middle SDI	3	Both	27	Age-standardized	509	Chronic obstructive pulmonary disease	99	Smoking	3	Rate	2021	27.473	33.5199	21.815
Deaths	174	Eastern Sub-Saharan Africa	3	Both	27	Age-standardized	509	Chronic obstructive pulmonary disease	338	Low temperature	3	Rate	2021	1.63641	2.06383	1.25676
Deaths	167	Central Sub-Saharan Africa	3	Both	27	Age-standardized	509	Chronic obstructive pulmonary disease	337	High temperature	3	Rate	2021	-0.12072	0.037778	-0.30387
Deaths	44634	High-middle SDI	3	Both	27	Age-standardized	509	Chronic obstructive pulmonary disease	99	Smoking	3	Rate	2021	14.743	18.0918	11.2504
Deaths	44635	High SDI	3	Both	27	Age-standardized	509	Chronic obstructive pulmonary disease	88	Ambient ozone pollution	3	Rate	2021	1.45649	2.53969	0.32102
Deaths	192	Southern Sub-Saharan Africa	3	Both	27	Age-standardized	509	Chronic obstructive pulmonary disease	129	Occupational particulate matter, gases, and fumes	3	Rate	2021	4.06308	4.86712	3.3667
Deaths	199	Western Sub-Saharan Africa	3	Both	27	Age-standardized	509	Chronic obstructive pulmonary disease	88	Ambient ozone pollution	3	Rate	2021	2.74859	4.83645	0.585717
Deaths	192	Southern Sub-Saharan Africa	3	Both	27	Age-standardized	509	Chronic obstructive pulmonary disease	338	Low temperature	3	Rate	2021	3.69576	4.23241	3.13851
Deaths	44635	High SDI	3	Both	27	Age-standardized	509	Chronic obstructive pulmonary disease	99	Smoking	3	Rate	2021	7.43197	9.17718	5.7252
Deaths	159	South Asia	3	Both	27	Age-standardized	509	Chronic obstructive pulmonary disease	337	High temperature	3	Rate	2021	2.01	5.0366	-0.22172
Deaths	167	Central Sub-Saharan Africa	3	Both	27	Age-standardized	509	Chronic obstructive pulmonary disease	380	Particulate matter pollution	3	Rate	2021	28.2381	44.5573	18.2421
Deaths	199	Western Sub-Saharan Africa	3	Both	27	Age-standardized	509	Chronic obstructive pulmonary disease	99	Smoking	3	Rate	2021	2.20885	2.84663	1.58456
Deaths	44636	Low-middle SDI	3	Both	27	Age-standardized	509	Chronic obstructive pulmonary disease	338	Low temperature	3	Rate	2021	3.5255	5.606	1.63603
Deaths	44637	Low SDI	3	Both	27	Age-standardized	509	Chronic obstructive pulmonary disease	88	Ambient ozone pollution	3	Rate	2021	13.461	23.3547	2.87773
Deaths	174	Eastern Sub-Saharan Africa	3	Both	27	Age-standardized	509	Chronic obstructive pulmonary disease	337	High temperature	3	Rate	2021	0.063015	0.203173	-0.01655
Deaths	44634	High-middle SDI	3	Both	27	Age-standardized	509	Chronic obstructive pulmonary disease	129	Occupational particulate matter, gases, and fumes	3	Rate	2021	5.48998	7.08258	4.07867
Deaths	44634	High-middle SDI	3	Both	27	Age-standardized	509	Chronic obstructive pulmonary disease	338	Low temperature	3	Rate	2021	4.00564	4.75634	3.3107
Deaths	44639	Middle SDI	3	Both	27	Age-standardized	509	Chronic obstructive pulmonary disease	99	Smoking	3	Rate	2021	21.0246	25.8537	16.1319
Deaths	44637	Low SDI	3	Both	27	Age-standardized	509	Chronic obstructive pulmonary disease	99	Smoking	3	Rate	2021	16.9742	21.2456	12.7125
Deaths	44634	High-middle SDI	3	Both	27	Age-standardized	509	Chronic obstructive pulmonary disease	88	Ambient ozone pollution	3	Rate	2021	3.78708	6.68771	0.781419
Deaths	44635	High SDI	3	Both	27	Age-standardized	509	Chronic obstructive pulmonary disease	338	Low temperature	3	Rate	2021	2.2757	2.49123	1.99859
Deaths	44639	Middle SDI	3	Both	27	Age-standardized	509	Chronic obstructive pulmonary disease	88	Ambient ozone pollution	3	Rate	2021	5.92953	10.1511	1.31415
Deaths	44636	Low-middle SDI	3	Both	27	Age-standardized	509	Chronic obstructive pulmonary disease	129	Occupational particulate matter, gases, and fumes	3	Rate	2021	13.55	16.6499	11.0399
Deaths	44636	Low-middle SDI	3	Both	27	Age-standardized	509	Chronic obstructive pulmonary disease	88	Ambient ozone pollution	3	Rate	2021	16.6162	28.222	3.65142
Deaths	199	Western Sub-Saharan Africa	3	Both	27	Age-standardized	509	Chronic obstructive pulmonary disease	338	Low temperature	3	Rate	2021	0.141772	0.254694	0.041124
Deaths	44637	Low SDI	3	Both	27	Age-standardized	509	Chronic obstructive pulmonary disease	338	Low temperature	3	Rate	2021	3.27901	4.90059	1.83574
Deaths	192	Southern Sub-Saharan Africa	3	Both	27	Age-standardized	509	Chronic obstructive pulmonary disease	337	High temperature	3	Rate	2021	0.007911	0.136797	-0.08404
Deaths	44639	Middle SDI	3	Both	27	Age-standardized	509	Chronic obstructive pulmonary disease	338	Low temperature	3	Rate	2021	5.16478	6.32754	4.13896
Deaths	159	South Asia	3	Both	27	Age-standardized	509	Chronic obstructive pulmonary disease	380	Particulate matter pollution	3	Rate	2021	62.4581	73.978	51.3183
Deaths	174	Eastern Sub-Saharan Africa	3	Both	27	Age-standardized	509	Chronic obstructive pulmonary disease	380	Particulate matter pollution	3	Rate	2021	21.2181	25.7685	16.5092
Deaths	44635	High SDI	3	Both	27	Age-standardized	509	Chronic obstructive pulmonary disease	129	Occupational particulate matter, gases, and fumes	3	Rate	2021	1.78036	2.19268	1.40442
Deaths	44634	High-middle SDI	3	Both	27	Age-standardized	509	Chronic obstructive pulmonary disease	337	High temperature	3	Rate	2021	0.189808	0.700289	-0.1767
Deaths	192	Southern Sub-Saharan Africa	3	Both	27	Age-standardized	509	Chronic obstructive pulmonary disease	380	Particulate matter pollution	3	Rate	2021	9.96485	13.6664	7.0976
Deaths	44636	Low-middle SDI	3	Both	27	Age-standardized	509	Chronic obstructive pulmonary disease	337	High temperature	3	Rate	2021	1.62401	4.02262	-0.08448
Deaths	44637	Low SDI	3	Both	27	Age-standardized	509	Chronic obstructive pulmonary disease	129	Occupational particulate matter, gases, and fumes	3	Rate	2021	11.4534	14.1896	8.98022
Deaths	199	Western Sub-Saharan Africa	3	Both	27	Age-standardized	509	Chronic obstructive pulmonary disease	129	Occupational particulate matter, gases, and fumes	3	Rate	2021	3.91096	4.83298	3.13052
Deaths	44639	Middle SDI	3	Both	27	Age-standardized	509	Chronic obstructive pulmonary disease	129	Occupational particulate matter, gases, and fumes	3	Rate	2021	9.82161	12.4589	7.58265
Deaths	44634	High-middle SDI	3	Both	27	Age-standardized	509	Chronic obstructive pulmonary disease	380	Particulate matter pollution	3	Rate	2021	10.0178	14.0254	7.55986
Deaths	44636	Low-middle SDI	3	Both	27	Age-standardized	509	Chronic obstructive pulmonary disease	380	Particulate matter pollution	3	Rate	2021	51.4041	60.8354	41.6064
Deaths	44635	High SDI	3	Both	27	Age-standardized	509	Chronic obstructive pulmonary disease	337	High temperature	3	Rate	2021	0.074078	0.297566	-0.08322
Deaths	44637	Low SDI	3	Both	27	Age-standardized	509	Chronic obstructive pulmonary disease	337	High temperature	3	Rate	2021	0.95288	2.60298	-0.17569
Deaths	199	Western Sub-Saharan Africa	3	Both	27	Age-standardized	509	Chronic obstructive pulmonary disease	337	High temperature	3	Rate	2021	0.562194	1.00834	0.303129
Deaths	44635	High SDI	3	Both	27	Age-standardized	509	Chronic obstructive pulmonary disease	380	Particulate matter pollution	3	Rate	2021	1.70994	2.26649	1.21497
Deaths	44639	Middle SDI	3	Both	27	Age-standardized	509	Chronic obstructive pulmonary disease	337	High temperature	3	Rate	2021	0.403246	1.09728	-0.08891
Deaths	199	Western Sub-Saharan Africa	3	Both	27	Age-standardized	509	Chronic obstructive pulmonary disease	380	Particulate matter pollution	3	Rate	2021	14.7126	17.5638	12.0328
Deaths	44637	Low SDI	3	Both	27	Age-standardized	509	Chronic obstructive pulmonary disease	380	Particulate matter pollution	3	Rate	2021	49.8536	57.5222	41.5079
Deaths	44639	Middle SDI	3	Both	27	Age-standardized	509	Chronic obstructive pulmonary disease	380	Particulate matter pollution	3	Rate	2021	22.3931	31.4882	16.0251
DALYs (Disability-Adjusted Life Years)	1	Global	3	Both	27	Age-standardized	509	Chronic obstructive pulmonary disease	88	Ambient ozone pollution	3	Rate	2021	103.005	175.729	22.453
DALYs (Disability-Adjusted Life Years)	1	Global	3	Both	27	Age-standardized	509	Chronic obstructive pulmonary disease	129	Occupational particulate matter, gases, and fumes	3	Rate	2021	147.293	174.538	122.999
DALYs (Disability-Adjusted Life Years)	1	Global	3	Both	27	Age-standardized	509	Chronic obstructive pulmonary disease	380	Particulate matter pollution	3	Rate	2021	389.497	484.622	312.589
DALYs (Disability-Adjusted Life Years)	1	Global	3	Both	27	Age-standardized	509	Chronic obstructive pulmonary disease	100	Secondhand smoke	3	Rate	2021	66.7784	106.978	26.5043
DALYs (Disability-Adjusted Life Years)	1	Global	3	Both	27	Age-standardized	509	Chronic obstructive pulmonary disease	338	Low temperature	3	Rate	2021	59.2187	72.3657	47.5755
DALYs (Disability-Adjusted Life Years)	1	Global	3	Both	27	Age-standardized	509	Chronic obstructive pulmonary disease	99	Smoking	3	Rate	2021	325.524	385.522	260.316
DALYs (Disability-Adjusted Life Years)	1	Global	3	Both	27	Age-standardized	509	Chronic obstructive pulmonary disease	337	High temperature	3	Rate	2021	8.1751	22.2928	-1.41993
DALYs (Disability-Adjusted Life Years)	5	East Asia	3	Both	27	Age-standardized	509	Chronic obstructive pulmonary disease	99	Smoking	3	Rate	2021	508.683	633.16	387.703
DALYs (Disability-Adjusted Life Years)	5	East Asia	3	Both	27	Age-standardized	509	Chronic obstructive pulmonary disease	88	Ambient ozone pollution	3	Rate	2021	101.171	183.566	21.0807
DALYs (Disability-Adjusted Life Years)	5	East Asia	3	Both	27	Age-standardized	509	Chronic obstructive pulmonary disease	337	High temperature	3	Rate	2021	5.56097	19.5337	-4.29914
DALYs (Disability-Adjusted Life Years)	9	Southeast Asia	3	Both	27	Age-standardized	509	Chronic obstructive pulmonary disease	129	Occupational particulate matter, gases, and fumes	3	Rate	2021	155.083	184.665	129.293
DALYs (Disability-Adjusted Life Years)	5	East Asia	3	Both	27	Age-standardized	509	Chronic obstructive pulmonary disease	100	Secondhand smoke	3	Rate	2021	112.782	184.893	45.5379
DALYs (Disability-Adjusted Life Years)	5	East Asia	3	Both	27	Age-standardized	509	Chronic obstructive pulmonary disease	129	Occupational particulate matter, gases, and fumes	3	Rate	2021	229.836	285.639	176.374
DALYs (Disability-Adjusted Life Years)	9	Southeast Asia	3	Both	27	Age-standardized	509	Chronic obstructive pulmonary disease	99	Smoking	3	Rate	2021	353.74	423.878	288.473
DALYs (Disability-Adjusted Life Years)	9	Southeast Asia	3	Both	27	Age-standardized	509	Chronic obstructive pulmonary disease	100	Secondhand smoke	3	Rate	2021	70.6909	114.453	27.1135
DALYs (Disability-Adjusted Life Years)	9	Southeast Asia	3	Both	27	Age-standardized	509	Chronic obstructive pulmonary disease	380	Particulate matter pollution	3	Rate	2021	345.462	483.838	236.319
DALYs (Disability-Adjusted Life Years)	9	Southeast Asia	3	Both	27	Age-standardized	509	Chronic obstructive pulmonary disease	88	Ambient ozone pollution	3	Rate	2021	45.4772	82.7701	9.1111
DALYs (Disability-Adjusted Life Years)	5	East Asia	3	Both	27	Age-standardized	509	Chronic obstructive pulmonary disease	338	Low temperature	3	Rate	2021	118.634	144.456	95.6744
DALYs (Disability-Adjusted Life Years)	5	East Asia	3	Both	27	Age-standardized	509	Chronic obstructive pulmonary disease	380	Particulate matter pollution	3	Rate	2021	476.453	666.155	349.214
DALYs (Disability-Adjusted Life Years)	9	Southeast Asia	3	Both	27	Age-standardized	509	Chronic obstructive pulmonary disease	337	High temperature	3	Rate	2021	4.77332	8.6077	2.54563
DALYs (Disability-Adjusted Life Years)	9	Southeast Asia	3	Both	27	Age-standardized	509	Chronic obstructive pulmonary disease	338	Low temperature	3	Rate	2021	9.42794	13.9157	5.31928
DALYs (Disability-Adjusted Life Years)	21	Oceania	3	Both	27	Age-standardized	509	Chronic obstructive pulmonary disease	99	Smoking	3	Rate	2021	549.315	734.145	402.649
DALYs (Disability-Adjusted Life Years)	21	Oceania	3	Both	27	Age-standardized	509	Chronic obstructive pulmonary disease	129	Occupational particulate matter, gases, and fumes	3	Rate	2021	242.438	312.614	181.83
DALYs (Disability-Adjusted Life Years)	21	Oceania	3	Both	27	Age-standardized	509	Chronic obstructive pulmonary disease	100	Secondhand smoke	3	Rate	2021	251.632	408.714	99.469
DALYs (Disability-Adjusted Life Years)	21	Oceania	3	Both	27	Age-standardized	509	Chronic obstructive pulmonary disease	88	Ambient ozone pollution	3	Rate	2021	4.78612	9.3197	0.975541
DALYs (Disability-Adjusted Life Years)	21	Oceania	3	Both	27	Age-standardized	509	Chronic obstructive pulmonary disease	380	Particulate matter pollution	3	Rate	2021	1494.73	1893.97	1120.13
DALYs (Disability-Adjusted Life Years)	32	Central Asia	3	Both	27	Age-standardized	509	Chronic obstructive pulmonary disease	88	Ambient ozone pollution	3	Rate	2021	41.5093	78.3812	8.10615
DALYs (Disability-Adjusted Life Years)	32	Central Asia	3	Both	27	Age-standardized	509	Chronic obstructive pulmonary disease	99	Smoking	3	Rate	2021	157.666	190.872	126.36
DALYs (Disability-Adjusted Life Years)	32	Central Asia	3	Both	27	Age-standardized	509	Chronic obstructive pulmonary disease	100	Secondhand smoke	3	Rate	2021	35.9766	58.5402	14.1101
DALYs (Disability-Adjusted Life Years)	21	Oceania	3	Both	27	Age-standardized	509	Chronic obstructive pulmonary disease	337	High temperature	3	Rate	2021	-0.96369	1.5783	-3.66189
DALYs (Disability-Adjusted Life Years)	32	Central Asia	3	Both	27	Age-standardized	509	Chronic obstructive pulmonary disease	129	Occupational particulate matter, gases, and fumes	3	Rate	2021	71.8285	86.455	59.85
DALYs (Disability-Adjusted Life Years)	21	Oceania	3	Both	27	Age-standardized	509	Chronic obstructive pulmonary disease	338	Low temperature	3	Rate	2021	115.748	147.042	88.5491
DALYs (Disability-Adjusted Life Years)	32	Central Asia	3	Both	27	Age-standardized	509	Chronic obstructive pulmonary disease	337	High temperature	3	Rate	2021	3.26229	8.82985	-1.59555
DALYs (Disability-Adjusted Life Years)	42	Central Europe	3	Both	27	Age-standardized	509	Chronic obstructive pulmonary disease	88	Ambient ozone pollution	3	Rate	2021	18.9819	33.9588	4.11292
DALYs (Disability-Adjusted Life Years)	42	Central Europe	3	Both	27	Age-standardized	509	Chronic obstructive pulmonary disease	129	Occupational particulate matter, gases, and fumes	3	Rate	2021	44.1512	52.2099	36.4143
DALYs (Disability-Adjusted Life Years)	56	Eastern Europe	3	Both	27	Age-standardized	509	Chronic obstructive pulmonary disease	338	Low temperature	3	Rate	2021	28.5833	32.7602	23.9385
DALYs (Disability-Adjusted Life Years)	32	Central Asia	3	Both	27	Age-standardized	509	Chronic obstructive pulmonary disease	338	Low temperature	3	Rate	2021	50.4536	57.5937	43.5002
DALYs (Disability-Adjusted Life Years)	56	Eastern Europe	3	Both	27	Age-standardized	509	Chronic obstructive pulmonary disease	380	Particulate matter pollution	3	Rate	2021	33.8346	50.3676	20.8103
DALYs (Disability-Adjusted Life Years)	42	Central Europe	3	Both	27	Age-standardized	509	Chronic obstructive pulmonary disease	100	Secondhand smoke	3	Rate	2021	26.5453	43.7025	10.4798
DALYs (Disability-Adjusted Life Years)	32	Central Asia	3	Both	27	Age-standardized	509	Chronic obstructive pulmonary disease	380	Particulate matter pollution	3	Rate	2021	134.463	178.301	98.6422
DALYs (Disability-Adjusted Life Years)	42	Central Europe	3	Both	27	Age-standardized	509	Chronic obstructive pulmonary disease	99	Smoking	3	Rate	2021	174.269	208.09	137.446
DALYs (Disability-Adjusted Life Years)	42	Central Europe	3	Both	27	Age-standardized	509	Chronic obstructive pulmonary disease	380	Particulate matter pollution	3	Rate	2021	65.7394	101.703	48.4824
DALYs (Disability-Adjusted Life Years)	42	Central Europe	3	Both	27	Age-standardized	509	Chronic obstructive pulmonary disease	338	Low temperature	3	Rate	2021	40.2416	44.876	35.1291
DALYs (Disability-Adjusted Life Years)	42	Central Europe	3	Both	27	Age-standardized	509	Chronic obstructive pulmonary disease	337	High temperature	3	Rate	2021	0.713401	3.772	-1.71816
DALYs (Disability-Adjusted Life Years)	65	High-income Asia Pacific	3	Both	27	Age-standardized	509	Chronic obstructive pulmonary disease	129	Occupational particulate matter, gases, and fumes	3	Rate	2021	20.2309	25.5365	15.9466
DALYs (Disability-Adjusted Life Years)	56	Eastern Europe	3	Both	27	Age-standardized	509	Chronic obstructive pulmonary disease	129	Occupational particulate matter, gases, and fumes	3	Rate	2021	35.5191	42.0509	29.4341
DALYs (Disability-Adjusted Life Years)	56	Eastern Europe	3	Both	27	Age-standardized	509	Chronic obstructive pulmonary disease	99	Smoking	3	Rate	2021	129.515	152.495	106.65
DALYs (Disability-Adjusted Life Years)	73	Western Europe	3	Both	27	Age-standardized	509	Chronic obstructive pulmonary disease	100	Secondhand smoke	3	Rate	2021	14.5167	23.9239	5.75687
DALYs (Disability-Adjusted Life Years)	70	Australasia	3	Both	27	Age-standardized	509	Chronic obstructive pulmonary disease	129	Occupational particulate matter, gases, and fumes	3	Rate	2021	32.1934	38.7949	26.3113
DALYs (Disability-Adjusted Life Years)	65	High-income Asia Pacific	3	Both	27	Age-standardized	509	Chronic obstructive pulmonary disease	99	Smoking	3	Rate	2021	73.129	90.8025	57.6577
DALYs (Disability-Adjusted Life Years)	65	High-income Asia Pacific	3	Both	27	Age-standardized	509	Chronic obstructive pulmonary disease	380	Particulate matter pollution	3	Rate	2021	25.8622	38.0963	15.5177
DALYs (Disability-Adjusted Life Years)	65	High-income Asia Pacific	3	Both	27	Age-standardized	509	Chronic obstructive pulmonary disease	88	Ambient ozone pollution	3	Rate	2021	11.1941	19.7516	2.40116
DALYs (Disability-Adjusted Life Years)	65	High-income Asia Pacific	3	Both	27	Age-standardized	509	Chronic obstructive pulmonary disease	100	Secondhand smoke	3	Rate	2021	8.28326	14.0958	3.23453
DALYs (Disability-Adjusted Life Years)	73	Western Europe	3	Both	27	Age-standardized	509	Chronic obstructive pulmonary disease	129	Occupational particulate matter, gases, and fumes	3	Rate	2021	34.0804	41.2375	27.8221
DALYs (Disability-Adjusted Life Years)	56	Eastern Europe	3	Both	27	Age-standardized	509	Chronic obstructive pulmonary disease	88	Ambient ozone pollution	3	Rate	2021	9.11745	16.554	1.85618
DALYs (Disability-Adjusted Life Years)	56	Eastern Europe	3	Both	27	Age-standardized	509	Chronic obstructive pulmonary disease	100	Secondhand smoke	3	Rate	2021	16.7709	27.705	6.53903
DALYs (Disability-Adjusted Life Years)	56	Eastern Europe	3	Both	27	Age-standardized	509	Chronic obstructive pulmonary disease	337	High temperature	3	Rate	2021	0.372666	1.60936	-0.91213
DALYs (Disability-Adjusted Life Years)	73	Western Europe	3	Both	27	Age-standardized	509	Chronic obstructive pulmonary disease	99	Smoking	3	Rate	2021	151.564	183.302	118.88
DALYs (Disability-Adjusted Life Years)	70	Australasia	3	Both	27	Age-standardized	509	Chronic obstructive pulmonary disease	380	Particulate matter pollution	3	Rate	2021	21.8386	31.3135	12.6707
DALYs (Disability-Adjusted Life Years)	73	Western Europe	3	Both	27	Age-standardized	509	Chronic obstructive pulmonary disease	88	Ambient ozone pollution	3	Rate	2021	19.8205	34.7093	4.37768
DALYs (Disability-Adjusted Life Years)	73	Western Europe	3	Both	27	Age-standardized	509	Chronic obstructive pulmonary disease	380	Particulate matter pollution	3	Rate	2021	29.7071	39.9966	20.2505
DALYs (Disability-Adjusted Life Years)	70	Australasia	3	Both	27	Age-standardized	509	Chronic obstructive pulmonary disease	99	Smoking	3	Rate	2021	104.241	132.938	78.5332
DALYs (Disability-Adjusted Life Years)	70	Australasia	3	Both	27	Age-standardized	509	Chronic obstructive pulmonary disease	88	Ambient ozone pollution	3	Rate	2021	5.24223	11.1186	0.91674
DALYs (Disability-Adjusted Life Years)	73	Western Europe	3	Both	27	Age-standardized	509	Chronic obstructive pulmonary disease	338	Low temperature	3	Rate	2021	37.4769	42.6928	33.2366
DALYs (Disability-Adjusted Life Years)	65	High-income Asia Pacific	3	Both	27	Age-standardized	509	Chronic obstructive pulmonary disease	337	High temperature	3	Rate	2021	0.233061	1.1567	-0.5051
DALYs (Disability-Adjusted Life Years)	65	High-income Asia Pacific	3	Both	27	Age-standardized	509	Chronic obstructive pulmonary disease	338	Low temperature	3	Rate	2021	11.6902	13.1309	9.94241
DALYs (Disability-Adjusted Life Years)	70	Australasia	3	Both	27	Age-standardized	509	Chronic obstructive pulmonary disease	100	Secondhand smoke	3	Rate	2021	11.8101	19.2944	4.59843
DALYs (Disability-Adjusted Life Years)	73	Western Europe	3	Both	27	Age-standardized	509	Chronic obstructive pulmonary disease	337	High temperature	3	Rate	2021	0.154443	0.921162	-0.51655
DALYs (Disability-Adjusted Life Years)	96	Southern Latin America	3	Both	27	Age-standardized	509	Chronic obstructive pulmonary disease	129	Occupational particulate matter, gases, and fumes	3	Rate	2021	50.7683	60.1546	41.8171
DALYs (Disability-Adjusted Life Years)	100	High-income North America	3	Both	27	Age-standardized	509	Chronic obstructive pulmonary disease	100	Secondhand smoke	3	Rate	2021	21.3038	34.9643	8.31146
DALYs (Disability-Adjusted Life Years)	70	Australasia	3	Both	27	Age-standardized	509	Chronic obstructive pulmonary disease	337	High temperature	3	Rate	2021	0.233687	1.34015	-0.48146
DALYs (Disability-Adjusted Life Years)	96	Southern Latin America	3	Both	27	Age-standardized	509	Chronic obstructive pulmonary disease	380	Particulate matter pollution	3	Rate	2021	58.0665	91.943	32.9851
DALYs (Disability-Adjusted Life Years)	100	High-income North America	3	Both	27	Age-standardized	509	Chronic obstructive pulmonary disease	99	Smoking	3	Rate	2021	303.03	374.471	235.417
DALYs (Disability-Adjusted Life Years)	70	Australasia	3	Both	27	Age-standardized	509	Chronic obstructive pulmonary disease	338	Low temperature	3	Rate	2021	33.8584	37.8587	29.1309
DALYs (Disability-Adjusted Life Years)	104	Caribbean	3	Both	27	Age-standardized	509	Chronic obstructive pulmonary disease	338	Low temperature	3	Rate	2021	2.87754	4.35181	1.28989
DALYs (Disability-Adjusted Life Years)	96	Southern Latin America	3	Both	27	Age-standardized	509	Chronic obstructive pulmonary disease	100	Secondhand smoke	3	Rate	2021	28.0029	45.3884	11.148
DALYs (Disability-Adjusted Life Years)	100	High-income North America	3	Both	27	Age-standardized	509	Chronic obstructive pulmonary disease	88	Ambient ozone pollution	3	Rate	2021	36.0249	62.6899	7.97907
DALYs (Disability-Adjusted Life Years)	96	Southern Latin America	3	Both	27	Age-standardized	509	Chronic obstructive pulmonary disease	88	Ambient ozone pollution	3	Rate	2021	14.1629	28.3175	2.72297
DALYs (Disability-Adjusted Life Years)	96	Southern Latin America	3	Both	27	Age-standardized	509	Chronic obstructive pulmonary disease	99	Smoking	3	Rate	2021	138.276	170.251	105.506
DALYs (Disability-Adjusted Life Years)	120	Andean Latin America	3	Both	27	Age-standardized	509	Chronic obstructive pulmonary disease	338	Low temperature	3	Rate	2021	17.3834	21.9492	13.4216
DALYs (Disability-Adjusted Life Years)	100	High-income North America	3	Both	27	Age-standardized	509	Chronic obstructive pulmonary disease	337	High temperature	3	Rate	2021	2.44591	10.8013	-3.23818
DALYs (Disability-Adjusted Life Years)	100	High-income North America	3	Both	27	Age-standardized	509	Chronic obstructive pulmonary disease	338	Low temperature	3	Rate	2021	58.3283	63.8484	51.0432
DALYs (Disability-Adjusted Life Years)	100	High-income North America	3	Both	27	Age-standardized	509	Chronic obstructive pulmonary disease	129	Occupational particulate matter, gases, and fumes	3	Rate	2021	63.6686	75.896	52.1264
DALYs (Disability-Adjusted Life Years)	96	Southern Latin America	3	Both	27	Age-standardized	509	Chronic obstructive pulmonary disease	338	Low temperature	3	Rate	2021	44.5935	48.9986	39.4925
DALYs (Disability-Adjusted Life Years)	96	Southern Latin America	3	Both	27	Age-standardized	509	Chronic obstructive pulmonary disease	337	High temperature	3	Rate	2021	0.260716	1.88488	-0.87492
DALYs (Disability-Adjusted Life Years)	100	High-income North America	3	Both	27	Age-standardized	509	Chronic obstructive pulmonary disease	380	Particulate matter pollution	3	Rate	2021	26.8604	42.7005	12.9181
DALYs (Disability-Adjusted Life Years)	104	Caribbean	3	Both	27	Age-standardized	509	Chronic obstructive pulmonary disease	380	Particulate matter pollution	3	Rate	2021	122.853	173.965	79.5399
DALYs (Disability-Adjusted Life Years)	120	Andean Latin America	3	Both	27	Age-standardized	509	Chronic obstructive pulmonary disease	380	Particulate matter pollution	3	Rate	2021	69.5831	101.968	44.3128
DALYs (Disability-Adjusted Life Years)	104	Caribbean	3	Both	27	Age-standardized	509	Chronic obstructive pulmonary disease	99	Smoking	3	Rate	2021	128.602	160.476	98.7086
DALYs (Disability-Adjusted Life Years)	104	Caribbean	3	Both	27	Age-standardized	509	Chronic obstructive pulmonary disease	129	Occupational particulate matter, gases, and fumes	3	Rate	2021	51.8633	62.526	41.184
DALYs (Disability-Adjusted Life Years)	104	Caribbean	3	Both	27	Age-standardized	509	Chronic obstructive pulmonary disease	88	Ambient ozone pollution	3	Rate	2021	11.3373	22.1149	2.00558
DALYs (Disability-Adjusted Life Years)	104	Caribbean	3	Both	27	Age-standardized	509	Chronic obstructive pulmonary disease	100	Secondhand smoke	3	Rate	2021	20.1732	34.0984	7.98103
DALYs (Disability-Adjusted Life Years)	104	Caribbean	3	Both	27	Age-standardized	509	Chronic obstructive pulmonary disease	337	High temperature	3	Rate	2021	-0.13832	0.483062	-0.4705
DALYs (Disability-Adjusted Life Years)	120	Andean Latin America	3	Both	27	Age-standardized	509	Chronic obstructive pulmonary disease	99	Smoking	3	Rate	2021	42.908	56.6977	31.0634
DALYs (Disability-Adjusted Life Years)	124	Central Latin America	3	Both	27	Age-standardized	509	Chronic obstructive pulmonary disease	100	Secondhand smoke	3	Rate	2021	23.5652	38.6532	9.05044
DALYs (Disability-Adjusted Life Years)	120	Andean Latin America	3	Both	27	Age-standardized	509	Chronic obstructive pulmonary disease	88	Ambient ozone pollution	3	Rate	2021	9.50869	18.6534	1.89681
DALYs (Disability-Adjusted Life Years)	124	Central Latin America	3	Both	27	Age-standardized	509	Chronic obstructive pulmonary disease	99	Smoking	3	Rate	2021	99.1347	125.118	76.4547
DALYs (Disability-Adjusted Life Years)	134	Tropical Latin America	3	Both	27	Age-standardized	509	Chronic obstructive pulmonary disease	99	Smoking	3	Rate	2021	176.203	221.14	133.858
DALYs (Disability-Adjusted Life Years)	124	Central Latin America	3	Both	27	Age-standardized	509	Chronic obstructive pulmonary disease	88	Ambient ozone pollution	3	Rate	2021	22.2083	39.779	4.90909
DALYs (Disability-Adjusted Life Years)	120	Andean Latin America	3	Both	27	Age-standardized	509	Chronic obstructive pulmonary disease	337	High temperature	3	Rate	2021	-0.04363	0.297211	-0.29156
DALYs (Disability-Adjusted Life Years)	124	Central Latin America	3	Both	27	Age-standardized	509	Chronic obstructive pulmonary disease	129	Occupational particulate matter, gases, and fumes	3	Rate	2021	67.0117	79.2624	54.468
DALYs (Disability-Adjusted Life Years)	120	Andean Latin America	3	Both	27	Age-standardized	509	Chronic obstructive pulmonary disease	100	Secondhand smoke	3	Rate	2021	7.92621	13.5577	2.90788
DALYs (Disability-Adjusted Life Years)	138	North Africa and Middle East	3	Both	27	Age-standardized	509	Chronic obstructive pulmonary disease	99	Smoking	3	Rate	2021	199.589	242.971	156.744
DALYs (Disability-Adjusted Life Years)	159	South Asia	3	Both	27	Age-standardized	509	Chronic obstructive pulmonary disease	99	Smoking	3	Rate	2021	591.696	727.282	464.043
DALYs (Disability-Adjusted Life Years)	159	South Asia	3	Both	27	Age-standardized	509	Chronic obstructive pulmonary disease	100	Secondhand smoke	3	Rate	2021	148.296	243.438	56.4114
DALYs (Disability-Adjusted Life Years)	134	Tropical Latin America	3	Both	27	Age-standardized	509	Chronic obstructive pulmonary disease	100	Secondhand smoke	3	Rate	2021	28.0656	46.8537	11.0358
DALYs (Disability-Adjusted Life Years)	138	North Africa and Middle East	3	Both	27	Age-standardized	509	Chronic obstructive pulmonary disease	88	Ambient ozone pollution	3	Rate	2021	59.4656	103.153	12.7205
DALYs (Disability-Adjusted Life Years)	124	Central Latin America	3	Both	27	Age-standardized	509	Chronic obstructive pulmonary disease	338	Low temperature	3	Rate	2021	27.9187	31.7646	23.1115
DALYs (Disability-Adjusted Life Years)	138	North Africa and Middle East	3	Both	27	Age-standardized	509	Chronic obstructive pulmonary disease	100	Secondhand smoke	3	Rate	2021	47.3769	78.2611	18.6406
DALYs (Disability-Adjusted Life Years)	138	North Africa and Middle East	3	Both	27	Age-standardized	509	Chronic obstructive pulmonary disease	129	Occupational particulate matter, gases, and fumes	3	Rate	2021	68.3324	82.6923	55.2682
DALYs (Disability-Adjusted Life Years)	134	Tropical Latin America	3	Both	27	Age-standardized	509	Chronic obstructive pulmonary disease	337	High temperature	3	Rate	2021	-0.00928	1.75317	-0.84255
DALYs (Disability-Adjusted Life Years)	159	South Asia	3	Both	27	Age-standardized	509	Chronic obstructive pulmonary disease	88	Ambient ozone pollution	3	Rate	2021	388.538	655.803	84.3205
DALYs (Disability-Adjusted Life Years)	120	Andean Latin America	3	Both	27	Age-standardized	509	Chronic obstructive pulmonary disease	129	Occupational particulate matter, gases, and fumes	3	Rate	2021	36.2836	45.5943	28.0044
DALYs (Disability-Adjusted Life Years)	134	Tropical Latin America	3	Both	27	Age-standardized	509	Chronic obstructive pulmonary disease	88	Ambient ozone pollution	3	Rate	2021	34.1836	60.4502	7.52609
DALYs (Disability-Adjusted Life Years)	124	Central Latin America	3	Both	27	Age-standardized	509	Chronic obstructive pulmonary disease	337	High temperature	3	Rate	2021	0.885344	2.45994	-0.17139
DALYs (Disability-Adjusted Life Years)	124	Central Latin America	3	Both	27	Age-standardized	509	Chronic obstructive pulmonary disease	380	Particulate matter pollution	3	Rate	2021	88.6845	141.18	59.4425
DALYs (Disability-Adjusted Life Years)	134	Tropical Latin America	3	Both	27	Age-standardized	509	Chronic obstructive pulmonary disease	129	Occupational particulate matter, gases, and fumes	3	Rate	2021	73.0256	84.79	61.2724
DALYs (Disability-Adjusted Life Years)	134	Tropical Latin America	3	Both	27	Age-standardized	509	Chronic obstructive pulmonary disease	338	Low temperature	3	Rate	2021	21.4414	26.6982	15.8778
DALYs (Disability-Adjusted Life Years)	159	South Asia	3	Both	27	Age-standardized	509	Chronic obstructive pulmonary disease	337	High temperature	3	Rate	2021	34.9746	88.982	-4.31024
DALYs (Disability-Adjusted Life Years)	138	North Africa and Middle East	3	Both	27	Age-standardized	509	Chronic obstructive pulmonary disease	337	High temperature	3	Rate	2021	9.05207	22.3364	-0.22553
DALYs (Disability-Adjusted Life Years)	159	South Asia	3	Both	27	Age-standardized	509	Chronic obstructive pulmonary disease	338	Low temperature	3	Rate	2021	74.3679	123.861	28.4523
DALYs (Disability-Adjusted Life Years)	138	North Africa and Middle East	3	Both	27	Age-standardized	509	Chronic obstructive pulmonary disease	338	Low temperature	3	Rate	2021	43.8393	51.9555	34.952
DALYs (Disability-Adjusted Life Years)	174	Eastern Sub-Saharan Africa	3	Both	27	Age-standardized	509	Chronic obstructive pulmonary disease	100	Secondhand smoke	3	Rate	2021	25.3084	44.1891	10.0507
DALYs (Disability-Adjusted Life Years)	159	South Asia	3	Both	27	Age-standardized	509	Chronic obstructive pulmonary disease	129	Occupational particulate matter, gases, and fumes	3	Rate	2021	320.258	390.035	264.016
DALYs (Disability-Adjusted Life Years)	138	North Africa and Middle East	3	Both	27	Age-standardized	509	Chronic obstructive pulmonary disease	380	Particulate matter pollution	3	Rate	2021	189.632	227.054	152.481
DALYs (Disability-Adjusted Life Years)	174	Eastern Sub-Saharan Africa	3	Both	27	Age-standardized	509	Chronic obstructive pulmonary disease	99	Smoking	3	Rate	2021	113.96	145.168	85.1198
DALYs (Disability-Adjusted Life Years)	174	Eastern Sub-Saharan Africa	3	Both	27	Age-standardized	509	Chronic obstructive pulmonary disease	129	Occupational particulate matter, gases, and fumes	3	Rate	2021	139.654	167.947	108.547
DALYs (Disability-Adjusted Life Years)	134	Tropical Latin America	3	Both	27	Age-standardized	509	Chronic obstructive pulmonary disease	380	Particulate matter pollution	3	Rate	2021	68.948	111.83	36.825
DALYs (Disability-Adjusted Life Years)	167	Central Sub-Saharan Africa	3	Both	27	Age-standardized	509	Chronic obstructive pulmonary disease	99	Smoking	3	Rate	2021	116.403	158.429	83.4531
DALYs (Disability-Adjusted Life Years)	174	Eastern Sub-Saharan Africa	3	Both	27	Age-standardized	509	Chronic obstructive pulmonary disease	338	Low temperature	3	Rate	2021	30.0675	37.7959	22.9215
DALYs (Disability-Adjusted Life Years)	174	Eastern Sub-Saharan Africa	3	Both	27	Age-standardized	509	Chronic obstructive pulmonary disease	88	Ambient ozone pollution	3	Rate	2021	43.3733	79.1738	8.60766
DALYs (Disability-Adjusted Life Years)	174	Eastern Sub-Saharan Africa	3	Both	27	Age-standardized	509	Chronic obstructive pulmonary disease	337	High temperature	3	Rate	2021	1.26141	3.97249	-0.26464
DALYs (Disability-Adjusted Life Years)	167	Central Sub-Saharan Africa	3	Both	27	Age-standardized	509	Chronic obstructive pulmonary disease	129	Occupational particulate matter, gases, and fumes	3	Rate	2021	170.233	244.476	121.458
DALYs (Disability-Adjusted Life Years)	159	South Asia	3	Both	27	Age-standardized	509	Chronic obstructive pulmonary disease	380	Particulate matter pollution	3	Rate	2021	1252.77	1459.08	1040.9
DALYs (Disability-Adjusted Life Years)	167	Central Sub-Saharan Africa	3	Both	27	Age-standardized	509	Chronic obstructive pulmonary disease	337	High temperature	3	Rate	2021	-2.24813	0.73277	-5.78045
DALYs (Disability-Adjusted Life Years)	174	Eastern Sub-Saharan Africa	3	Both	27	Age-standardized	509	Chronic obstructive pulmonary disease	380	Particulate matter pollution	3	Rate	2021	499.361	593.185	403.302
DALYs (Disability-Adjusted Life Years)	167	Central Sub-Saharan Africa	3	Both	27	Age-standardized	509	Chronic obstructive pulmonary disease	100	Secondhand smoke	3	Rate	2021	34.2575	64.1005	13.227
DALYs (Disability-Adjusted Life Years)	167	Central Sub-Saharan Africa	3	Both	27	Age-standardized	509	Chronic obstructive pulmonary disease	88	Ambient ozone pollution	3	Rate	2021	87.4313	174.616	15.2442
DALYs (Disability-Adjusted Life Years)	192	Southern Sub-Saharan Africa	3	Both	27	Age-standardized	509	Chronic obstructive pulmonary disease	99	Smoking	3	Rate	2021	228.276	280.237	180.348
DALYs (Disability-Adjusted Life Years)	192	Southern Sub-Saharan Africa	3	Both	27	Age-standardized	509	Chronic obstructive pulmonary disease	88	Ambient ozone pollution	3	Rate	2021	41.6438	73.9067	8.89819
DALYs (Disability-Adjusted Life Years)	192	Southern Sub-Saharan Africa	3	Both	27	Age-standardized	509	Chronic obstructive pulmonary disease	100	Secondhand smoke	3	Rate	2021	59.9628	95.8037	23.6957
DALYs (Disability-Adjusted Life Years)	167	Central Sub-Saharan Africa	3	Both	27	Age-standardized	509	Chronic obstructive pulmonary disease	380	Particulate matter pollution	3	Rate	2021	636.223	907.543	443.62
DALYs (Disability-Adjusted Life Years)	192	Southern Sub-Saharan Africa	3	Both	27	Age-standardized	509	Chronic obstructive pulmonary disease	129	Occupational particulate matter, gases, and fumes	3	Rate	2021	98.8187	115.111	83.4358
DALYs (Disability-Adjusted Life Years)	44635	High SDI	3	Both	27	Age-standardized	509	Chronic obstructive pulmonary disease	99	Smoking	3	Rate	2021	190.055	230.912	149.492
DALYs (Disability-Adjusted Life Years)	44634	High-middle SDI	3	Both	27	Age-standardized	509	Chronic obstructive pulmonary disease	380	Particulate matter pollution	3	Rate	2021	189.81	256.118	146.278
DALYs (Disability-Adjusted Life Years)	44635	High SDI	3	Both	27	Age-standardized	509	Chronic obstructive pulmonary disease	337	High temperature	3	Rate	2021	1.51132	5.5951	-1.31496
DALYs (Disability-Adjusted Life Years)	192	Southern Sub-Saharan Africa	3	Both	27	Age-standardized	509	Chronic obstructive pulmonary disease	337	High temperature	3	Rate	2021	0.156262	2.59993	-1.60253
DALYs (Disability-Adjusted Life Years)	199	Western Sub-Saharan Africa	3	Both	27	Age-standardized	509	Chronic obstructive pulmonary disease	100	Secondhand smoke	3	Rate	2021	20.2293	34.6127	7.79075
DALYs (Disability-Adjusted Life Years)	199	Western Sub-Saharan Africa	3	Both	27	Age-standardized	509	Chronic obstructive pulmonary disease	99	Smoking	3	Rate	2021	57.9513	73.1314	42.4452
DALYs (Disability-Adjusted Life Years)	44634	High-middle SDI	3	Both	27	Age-standardized	509	Chronic obstructive pulmonary disease	338	Low temperature	3	Rate	2021	60.3566	71.65	50.6163
DALYs (Disability-Adjusted Life Years)	192	Southern Sub-Saharan Africa	3	Both	27	Age-standardized	509	Chronic obstructive pulmonary disease	380	Particulate matter pollution	3	Rate	2021	248.782	339.51	178.725
DALYs (Disability-Adjusted Life Years)	167	Central Sub-Saharan Africa	3	Both	27	Age-standardized	509	Chronic obstructive pulmonary disease	338	Low temperature	3	Rate	2021	16.4082	25.7612	9.89125
DALYs (Disability-Adjusted Life Years)	192	Southern Sub-Saharan Africa	3	Both	27	Age-standardized	509	Chronic obstructive pulmonary disease	338	Low temperature	3	Rate	2021	69.2612	79.5923	58.6456
DALYs (Disability-Adjusted Life Years)	199	Western Sub-Saharan Africa	3	Both	27	Age-standardized	509	Chronic obstructive pulmonary disease	129	Occupational particulate matter, gases, and fumes	3	Rate	2021	96.5179	113.892	79.9979
DALYs (Disability-Adjusted Life Years)	44635	High SDI	3	Both	27	Age-standardized	509	Chronic obstructive pulmonary disease	88	Ambient ozone pollution	3	Rate	2021	24.5169	42.4756	5.37273
DALYs (Disability-Adjusted Life Years)	199	Western Sub-Saharan Africa	3	Both	27	Age-standardized	509	Chronic obstructive pulmonary disease	88	Ambient ozone pollution	3	Rate	2021	49.7722	87.8609	10.6357
DALYs (Disability-Adjusted Life Years)	44635	High SDI	3	Both	27	Age-standardized	509	Chronic obstructive pulmonary disease	129	Occupational particulate matter, gases, and fumes	3	Rate	2021	44.6	52.8774	36.8022
DALYs (Disability-Adjusted Life Years)	199	Western Sub-Saharan Africa	3	Both	27	Age-standardized	509	Chronic obstructive pulmonary disease	338	Low temperature	3	Rate	2021	2.64319	4.7498	0.751655
DALYs (Disability-Adjusted Life Years)	199	Western Sub-Saharan Africa	3	Both	27	Age-standardized	509	Chronic obstructive pulmonary disease	337	High temperature	3	Rate	2021	10.6564	19.0828	5.68895
DALYs (Disability-Adjusted Life Years)	44636	Low-middle SDI	3	Both	27	Age-standardized	509	Chronic obstructive pulmonary disease	99	Smoking	3	Rate	2021	542.248	659.199	432.858
DALYs (Disability-Adjusted Life Years)	44636	Low-middle SDI	3	Both	27	Age-standardized	509	Chronic obstructive pulmonary disease	100	Secondhand smoke	3	Rate	2021	127.087	208.117	49.5273
DALYs (Disability-Adjusted Life Years)	44635	High SDI	3	Both	27	Age-standardized	509	Chronic obstructive pulmonary disease	100	Secondhand smoke	3	Rate	2021	17.5546	28.5249	7.05702
DALYs (Disability-Adjusted Life Years)	44634	High-middle SDI	3	Both	27	Age-standardized	509	Chronic obstructive pulmonary disease	99	Smoking	3	Rate	2021	281.308	341.61	223.531
DALYs (Disability-Adjusted Life Years)	44637	Low SDI	3	Both	27	Age-standardized	509	Chronic obstructive pulmonary disease	100	Secondhand smoke	3	Rate	2021	87.7377	144.523	33.2669
DALYs (Disability-Adjusted Life Years)	44636	Low-middle SDI	3	Both	27	Age-standardized	509	Chronic obstructive pulmonary disease	129	Occupational particulate matter, gases, and fumes	3	Rate	2021	278.283	334.627	233.339
DALYs (Disability-Adjusted Life Years)	199	Western Sub-Saharan Africa	3	Both	27	Age-standardized	509	Chronic obstructive pulmonary disease	380	Particulate matter pollution	3	Rate	2021	372.375	435.479	308.317
DALYs (Disability-Adjusted Life Years)	44636	Low-middle SDI	3	Both	27	Age-standardized	509	Chronic obstructive pulmonary disease	88	Ambient ozone pollution	3	Rate	2021	288.997	487.262	63.1877
DALYs (Disability-Adjusted Life Years)	44635	High SDI	3	Both	27	Age-standardized	509	Chronic obstructive pulmonary disease	380	Particulate matter pollution	3	Rate	2021	41.3155	54.8663	29.4069
DALYs (Disability-Adjusted Life Years)	44635	High SDI	3	Both	27	Age-standardized	509	Chronic obstructive pulmonary disease	338	Low temperature	3	Rate	2021	38.6183	41.9813	34.3288
DALYs (Disability-Adjusted Life Years)	44636	Low-middle SDI	3	Both	27	Age-standardized	509	Chronic obstructive pulmonary disease	337	High temperature	3	Rate	2021	28.4768	71.3274	-1.73643
DALYs (Disability-Adjusted Life Years)	44634	High-middle SDI	3	Both	27	Age-standardized	509	Chronic obstructive pulmonary disease	337	High temperature	3	Rate	2021	2.89681	10.635	-2.71392
DALYs (Disability-Adjusted Life Years)	44636	Low-middle SDI	3	Both	27	Age-standardized	509	Chronic obstructive pulmonary disease	338	Low temperature	3	Rate	2021	61.907	99.2951	28.5181
DALYs (Disability-Adjusted Life Years)	44637	Low SDI	3	Both	27	Age-standardized	509	Chronic obstructive pulmonary disease	338	Low temperature	3	Rate	2021	56.8644	83.7235	32.355
DALYs (Disability-Adjusted Life Years)	44634	High-middle SDI	3	Both	27	Age-standardized	509	Chronic obstructive pulmonary disease	100	Secondhand smoke	3	Rate	2021	56.2997	90.3041	22.5989
DALYs (Disability-Adjusted Life Years)	44639	Middle SDI	3	Both	27	Age-standardized	509	Chronic obstructive pulmonary disease	100	Secondhand smoke	3	Rate	2021	86.6976	142.013	35.2929
DALYs (Disability-Adjusted Life Years)	44637	Low SDI	3	Both	27	Age-standardized	509	Chronic obstructive pulmonary disease	99	Smoking	3	Rate	2021	335.205	419.43	255.286
DALYs (Disability-Adjusted Life Years)	44636	Low-middle SDI	3	Both	27	Age-standardized	509	Chronic obstructive pulmonary disease	380	Particulate matter pollution	3	Rate	2021	1030.36	1201.46	844.292
DALYs (Disability-Adjusted Life Years)	44634	High-middle SDI	3	Both	27	Age-standardized	509	Chronic obstructive pulmonary disease	88	Ambient ozone pollution	3	Rate	2021	56.0148	99.0598	11.609
DALYs (Disability-Adjusted Life Years)	44637	Low SDI	3	Both	27	Age-standardized	509	Chronic obstructive pulmonary disease	88	Ambient ozone pollution	3	Rate	2021	231.169	399.723	49.2956
DALYs (Disability-Adjusted Life Years)	44634	High-middle SDI	3	Both	27	Age-standardized	509	Chronic obstructive pulmonary disease	129	Occupational particulate matter, gases, and fumes	3	Rate	2021	108.269	131.392	87.3271
DALYs (Disability-Adjusted Life Years)	44637	Low SDI	3	Both	27	Age-standardized	509	Chronic obstructive pulmonary disease	129	Occupational particulate matter, gases, and fumes	3	Rate	2021	238.669	285.939	196.295
DALYs (Disability-Adjusted Life Years)	44639	Middle SDI	3	Both	27	Age-standardized	509	Chronic obstructive pulmonary disease	338	Low temperature	3	Rate	2021	77.711	95.2045	62.2785
DALYs (Disability-Adjusted Life Years)	44637	Low SDI	3	Both	27	Age-standardized	509	Chronic obstructive pulmonary disease	337	High temperature	3	Rate	2021	16.5986	45.6663	-2.80979
DALYs (Disability-Adjusted Life Years)	44639	Middle SDI	3	Both	27	Age-standardized	509	Chronic obstructive pulmonary disease	99	Smoking	3	Rate	2021	379.972	460.967	297.637
DALYs (Disability-Adjusted Life Years)	44639	Middle SDI	3	Both	27	Age-standardized	509	Chronic obstructive pulmonary disease	337	High temperature	3	Rate	2021	6.5666	17.6442	-1.28101
DALYs (Disability-Adjusted Life Years)	44637	Low SDI	3	Both	27	Age-standardized	509	Chronic obstructive pulmonary disease	380	Particulate matter pollution	3	Rate	2021	1021.71	1172.94	856.615
DALYs (Disability-Adjusted Life Years)	44639	Middle SDI	3	Both	27	Age-standardized	509	Chronic obstructive pulmonary disease	88	Ambient ozone pollution	3	Rate	2021	94.7663	162.008	20.8873
DALYs (Disability-Adjusted Life Years)	44639	Middle SDI	3	Both	27	Age-standardized	509	Chronic obstructive pulmonary disease	129	Occupational particulate matter, gases, and fumes	3	Rate	2021	185.628	223.701	151.489
DALYs (Disability-Adjusted Life Years)	44639	Middle SDI	3	Both	27	Age-standardized	509	Chronic obstructive pulmonary disease	380	Particulate matter pollution	3	Rate	2021	416.103	578.432	304.579

## Sheet: S3
Table 1 S3 Incidence rate, mortality rate, and disability-adjusted life years (DALYs) of COPD in Asia in 2021.
measure_name	location_id	location_name	sex_id	sex_name	age_id	age_name	cause_id	cause_name	metric_id	metric_name	year	val	upper	lower
Deaths	9	Southeast Asia	1	Male	22	All ages	509	Chronic obstructive pulmonary disease	1	Number	2021	149336	167958	132444
Deaths	9	Southeast Asia	2	Female	22	All ages	509	Chronic obstructive pulmonary disease	1	Number	2021	79151.3	99626.4	65250.5
Deaths	9	Southeast Asia	3	Both	22	All ages	509	Chronic obstructive pulmonary disease	1	Number	2021	228487	257525	202410
Deaths	9	Southeast Asia	1	Male	22	All ages	509	Chronic obstructive pulmonary disease	3	Rate	2021	42.7246	48.0522	37.8917
Deaths	9	Southeast Asia	2	Female	22	All ages	509	Chronic obstructive pulmonary disease	3	Rate	2021	22.6942	28.5648	18.7086
Deaths	9	Southeast Asia	3	Both	22	All ages	509	Chronic obstructive pulmonary disease	3	Rate	2021	32.7203	36.8786	28.9859
Deaths	9	Southeast Asia	1	Male	27	Age-standardized	509	Chronic obstructive pulmonary disease	3	Rate	2021	65.1082	72.8164	58.0976
Deaths	9	Southeast Asia	2	Female	27	Age-standardized	509	Chronic obstructive pulmonary disease	3	Rate	2021	26.9556	33.7706	22.2605
Deaths	9	Southeast Asia	3	Both	27	Age-standardized	509	Chronic obstructive pulmonary disease	3	Rate	2021	43.1378	48.5427	38.2433
Deaths	32	Central Asia	1	Male	22	All ages	509	Chronic obstructive pulmonary disease	1	Number	2021	8724.73	9699.52	7828.4
Deaths	32	Central Asia	2	Female	22	All ages	509	Chronic obstructive pulmonary disease	1	Number	2021	5747.57	6573.6	5079.13
Deaths	32	Central Asia	3	Both	22	All ages	509	Chronic obstructive pulmonary disease	1	Number	2021	14472.3	16004.5	12972.3
Deaths	32	Central Asia	1	Male	22	All ages	509	Chronic obstructive pulmonary disease	3	Rate	2021	18.3565	20.4074	16.4706
Deaths	32	Central Asia	2	Female	22	All ages	509	Chronic obstructive pulmonary disease	3	Rate	2021	11.9048	13.6157	10.5203
Deaths	32	Central Asia	3	Both	22	All ages	509	Chronic obstructive pulmonary disease	3	Rate	2021	15.1054	16.7046	13.5398
Deaths	32	Central Asia	1	Male	27	Age-standardized	509	Chronic obstructive pulmonary disease	3	Rate	2021	32.0362	35.3377	28.9805
Deaths	32	Central Asia	2	Female	27	Age-standardized	509	Chronic obstructive pulmonary disease	3	Rate	2021	14.3879	16.4091	12.7384
Deaths	32	Central Asia	3	Both	27	Age-standardized	509	Chronic obstructive pulmonary disease	3	Rate	2021	21.2741	23.4644	19.1152
Deaths	158	South Asia	1	Male	22	All ages	509	Chronic obstructive pulmonary disease	1	Number	2021	680330	782547	551479
Deaths	158	South Asia	2	Female	22	All ages	509	Chronic obstructive pulmonary disease	1	Number	2021	549279	669885	430866
Deaths	158	South Asia	3	Both	22	All ages	509	Chronic obstructive pulmonary disease	1	Number	2021	1229610	1381284	1104445
Deaths	158	South Asia	1	Male	22	All ages	509	Chronic obstructive pulmonary disease	3	Rate	2021	72.3005	83.1633	58.6071
Deaths	158	South Asia	2	Female	22	All ages	509	Chronic obstructive pulmonary disease	3	Rate	2021	60.6539	73.9718	47.5781
Deaths	158	South Asia	3	Both	22	All ages	509	Chronic obstructive pulmonary disease	3	Rate	2021	66.5888	74.8026	59.8106
Deaths	158	South Asia	1	Male	27	Age-standardized	509	Chronic obstructive pulmonary disease	3	Rate	2021	117.575	135.325	96.1777
Deaths	158	South Asia	2	Female	27	Age-standardized	509	Chronic obstructive pulmonary disease	3	Rate	2021	87.3014	106.522	68.5981
Deaths	158	South Asia	3	Both	27	Age-standardized	509	Chronic obstructive pulmonary disease	3	Rate	2021	101.627	114.338	90.5498
Deaths	5	East Asia	1	Male	22	All ages	509	Chronic obstructive pulmonary disease	1	Number	2021	770632	935956	605702
Deaths	5	East Asia	2	Female	22	All ages	509	Chronic obstructive pulmonary disease	1	Number	2021	552808	708340	413884
Deaths	5	East Asia	3	Both	22	All ages	509	Chronic obstructive pulmonary disease	1	Number	2021	1323441	1574211	1082508
Deaths	5	East Asia	1	Male	22	All ages	509	Chronic obstructive pulmonary disease	3	Rate	2021	102.354	124.312	80.4481
Deaths	5	East Asia	2	Female	22	All ages	509	Chronic obstructive pulmonary disease	3	Rate	2021	76.7935	98.3991	57.4948
Deaths	5	East Asia	3	Both	22	All ages	509	Chronic obstructive pulmonary disease	3	Rate	2021	89.8604	106.887	73.5012
Deaths	5	East Asia	1	Male	27	Age-standardized	509	Chronic obstructive pulmonary disease	3	Rate	2021	103.245	123.32	82.6163
Deaths	5	East Asia	2	Female	27	Age-standardized	509	Chronic obstructive pulmonary disease	3	Rate	2021	52.2766	66.7845	39.001
Deaths	5	East Asia	3	Both	27	Age-standardized	509	Chronic obstructive pulmonary disease	3	Rate	2021	72.1972	85.2639	59.3213
Deaths	44561	Asia	1	Male	22	All ages	509	Chronic obstructive pulmonary disease	1	Number	2021	1665024	1862251	1402706
Deaths	44561	Asia	2	Female	22	All ages	509	Chronic obstructive pulmonary disease	1	Number	2021	1220035	1468103	995462
Deaths	44561	Asia	3	Both	22	All ages	509	Chronic obstructive pulmonary disease	1	Number	2021	2885059	3218689	2571267
Deaths	44561	Asia	1	Male	22	All ages	509	Chronic obstructive pulmonary disease	3	Rate	2021	70.7544	79.1355	59.6073
Deaths	44561	Asia	2	Female	22	All ages	509	Chronic obstructive pulmonary disease	3	Rate	2021	53.7583	64.689	43.863
Deaths	44561	Asia	3	Both	22	All ages	509	Chronic obstructive pulmonary disease	3	Rate	2021	62.4103	69.6275	55.6223
Deaths	44561	Asia	1	Male	27	Age-standardized	509	Chronic obstructive pulmonary disease	3	Rate	2021	84.7629	94.6607	71.0764
Deaths	44561	Asia	2	Female	27	Age-standardized	509	Chronic obstructive pulmonary disease	3	Rate	2021	48.6314	58.5628	39.5803
Deaths	44561	Asia	3	Both	27	Age-standardized	509	Chronic obstructive pulmonary disease	3	Rate	2021	64.0991	71.6569	56.7371
DALYs (Disability-Adjusted Life Years)	32	Central Asia	1	Male	22	All ages	509	Chronic obstructive pulmonary disease	1	Number	2021	227352	252666	203951
DALYs (Disability-Adjusted Life Years)	32	Central Asia	2	Female	22	All ages	509	Chronic obstructive pulmonary disease	1	Number	2021	157990	178396	141748
DALYs (Disability-Adjusted Life Years)	32	Central Asia	3	Both	22	All ages	509	Chronic obstructive pulmonary disease	1	Number	2021	385342	424298	348373
DALYs (Disability-Adjusted Life Years)	32	Central Asia	1	Male	22	All ages	509	Chronic obstructive pulmonary disease	3	Rate	2021	478.34	531.599	429.105
DALYs (Disability-Adjusted Life Years)	32	Central Asia	2	Female	22	All ages	509	Chronic obstructive pulmonary disease	3	Rate	2021	327.24	369.507	293.6
DALYs (Disability-Adjusted Life Years)	32	Central Asia	3	Both	22	All ages	509	Chronic obstructive pulmonary disease	3	Rate	2021	402.198	442.859	363.613
DALYs (Disability-Adjusted Life Years)	32	Central Asia	1	Male	27	Age-standardized	509	Chronic obstructive pulmonary disease	3	Rate	2021	689.665	762.498	623.667
DALYs (Disability-Adjusted Life Years)	32	Central Asia	2	Female	27	Age-standardized	509	Chronic obstructive pulmonary disease	3	Rate	2021	362.494	406.234	325.406
DALYs (Disability-Adjusted Life Years)	32	Central Asia	3	Both	27	Age-standardized	509	Chronic obstructive pulmonary disease	3	Rate	2021	498.599	546.095	452.008
DALYs (Disability-Adjusted Life Years)	9	Southeast Asia	1	Male	22	All ages	509	Chronic obstructive pulmonary disease	1	Number	2021	3631416	4063625	3237727
DALYs (Disability-Adjusted Life Years)	9	Southeast Asia	2	Female	22	All ages	509	Chronic obstructive pulmonary disease	1	Number	2021	1927175	2314606	1636485
DALYs (Disability-Adjusted Life Years)	9	Southeast Asia	3	Both	22	All ages	509	Chronic obstructive pulmonary disease	1	Number	2021	5558590	6206668	4982450
DALYs (Disability-Adjusted Life Years)	9	Southeast Asia	1	Male	22	All ages	509	Chronic obstructive pulmonary disease	3	Rate	2021	1038.94	1162.59	926.304
DALYs (Disability-Adjusted Life Years)	9	Southeast Asia	2	Female	22	All ages	509	Chronic obstructive pulmonary disease	3	Rate	2021	552.559	663.643	469.212
DALYs (Disability-Adjusted Life Years)	9	Southeast Asia	3	Both	22	All ages	509	Chronic obstructive pulmonary disease	3	Rate	2021	796.012	888.819	713.507
DALYs (Disability-Adjusted Life Years)	9	Southeast Asia	1	Male	27	Age-standardized	509	Chronic obstructive pulmonary disease	3	Rate	2021	1326.47	1480.93	1186.54
DALYs (Disability-Adjusted Life Years)	9	Southeast Asia	2	Female	27	Age-standardized	509	Chronic obstructive pulmonary disease	3	Rate	2021	587.491	705.416	498.409
DALYs (Disability-Adjusted Life Years)	9	Southeast Asia	3	Both	27	Age-standardized	509	Chronic obstructive pulmonary disease	3	Rate	2021	914.727	1016.35	822.266
DALYs (Disability-Adjusted Life Years)	158	South Asia	1	Male	22	All ages	509	Chronic obstructive pulmonary disease	1	Number	2021	15646367	17747814	12777218
DALYs (Disability-Adjusted Life Years)	158	South Asia	2	Female	22	All ages	509	Chronic obstructive pulmonary disease	1	Number	2021	12363233	14609562	10084776
DALYs (Disability-Adjusted Life Years)	158	South Asia	3	Both	22	All ages	509	Chronic obstructive pulmonary disease	1	Number	2021	28009599	30942201	25404007
DALYs (Disability-Adjusted Life Years)	158	South Asia	1	Male	22	All ages	509	Chronic obstructive pulmonary disease	3	Rate	2021	1662.78	1886.11	1357.87
DALYs (Disability-Adjusted Life Years)	158	South Asia	2	Female	22	All ages	509	Chronic obstructive pulmonary disease	3	Rate	2021	1365.2	1613.26	1113.61
DALYs (Disability-Adjusted Life Years)	158	South Asia	3	Both	22	All ages	509	Chronic obstructive pulmonary disease	3	Rate	2021	1516.84	1675.66	1375.74
DALYs (Disability-Adjusted Life Years)	158	South Asia	1	Male	27	Age-standardized	509	Chronic obstructive pulmonary disease	3	Rate	2021	2351.16	2665.91	1929.06
DALYs (Disability-Adjusted Life Years)	158	South Asia	2	Female	27	Age-standardized	509	Chronic obstructive pulmonary disease	3	Rate	2021	1766.17	2092.84	1438.88
DALYs (Disability-Adjusted Life Years)	158	South Asia	3	Both	27	Age-standardized	509	Chronic obstructive pulmonary disease	3	Rate	2021	2049.22	2268.73	1862.71
DALYs (Disability-Adjusted Life Years)	44561	Asia	1	Male	22	All ages	509	Chronic obstructive pulmonary disease	1	Number	2021	34678170	38510138	29894694
DALYs (Disability-Adjusted Life Years)	44561	Asia	2	Female	22	All ages	509	Chronic obstructive pulmonary disease	1	Number	2021	25828930	30064248	21901316
DALYs (Disability-Adjusted Life Years)	44561	Asia	3	Both	22	All ages	509	Chronic obstructive pulmonary disease	1	Number	2021	60507100	66518282	55319463
DALYs (Disability-Adjusted Life Years)	44561	Asia	1	Male	22	All ages	509	Chronic obstructive pulmonary disease	3	Rate	2021	1473.63	1636.47	1270.36
DALYs (Disability-Adjusted Life Years)	44561	Asia	2	Female	22	All ages	509	Chronic obstructive pulmonary disease	3	Rate	2021	1138.1	1324.72	965.036
DALYs (Disability-Adjusted Life Years)	44561	Asia	3	Both	22	All ages	509	Chronic obstructive pulmonary disease	3	Rate	2021	1308.9	1438.94	1196.68
DALYs (Disability-Adjusted Life Years)	44561	Asia	1	Male	27	Age-standardized	509	Chronic obstructive pulmonary disease	3	Rate	2021	1562.09	1731.93	1350.26
DALYs (Disability-Adjusted Life Years)	44561	Asia	2	Female	27	Age-standardized	509	Chronic obstructive pulmonary disease	3	Rate	2021	999.583	1163.61	848.327
DALYs (Disability-Adjusted Life Years)	44561	Asia	3	Both	27	Age-standardized	509	Chronic obstructive pulmonary disease	3	Rate	2021	1253.15	1376.29	1148.26
DALYs (Disability-Adjusted Life Years)	5	East Asia	1	Male	22	All ages	509	Chronic obstructive pulmonary disease	1	Number	2021	13864925	16728478	11033302
DALYs (Disability-Adjusted Life Years)	5	East Asia	2	Female	22	All ages	509	Chronic obstructive pulmonary disease	1	Number	2021	10526819	13073388	8388404
DALYs (Disability-Adjusted Life Years)	5	East Asia	3	Both	22	All ages	509	Chronic obstructive pulmonary disease	1	Number	2021	24391744	28628224	20763410
DALYs (Disability-Adjusted Life Years)	5	East Asia	1	Male	22	All ages	509	Chronic obstructive pulmonary disease	3	Rate	2021	1841.51	2221.84	1465.42
DALYs (Disability-Adjusted Life Years)	5	East Asia	2	Female	22	All ages	509	Chronic obstructive pulmonary disease	3	Rate	2021	1462.34	1816.09	1165.28
DALYs (Disability-Adjusted Life Years)	5	East Asia	3	Both	22	All ages	509	Chronic obstructive pulmonary disease	3	Rate	2021	1656.18	1943.83	1409.82
DALYs (Disability-Adjusted Life Years)	5	East Asia	1	Male	27	Age-standardized	509	Chronic obstructive pulmonary disease	3	Rate	2021	1581.54	1887.91	1272.87
DALYs (Disability-Adjusted Life Years)	5	East Asia	2	Female	27	Age-standardized	509	Chronic obstructive pulmonary disease	3	Rate	2021	958.488	1187.94	766.977
DALYs (Disability-Adjusted Life Years)	5	East Asia	3	Both	27	Age-standardized	509	Chronic obstructive pulmonary disease	3	Rate	2021	1217.69	1422.79	1043.87
Incidence	158	South Asia	1	Male	22	All ages	509	Chronic obstructive pulmonary disease	1	Number	2021	1813052	1940439	1684998
Incidence	158	South Asia	2	Female	22	All ages	509	Chronic obstructive pulmonary disease	1	Number	2021	1966814	2093183	1828839
Incidence	158	South Asia	3	Both	22	All ages	509	Chronic obstructive pulmonary disease	1	Number	2021	3779866	4030885	3513161
Incidence	158	South Asia	1	Male	22	All ages	509	Chronic obstructive pulmonary disease	3	Rate	2021	192.678	206.216	179.069
Incidence	158	South Asia	2	Female	22	All ages	509	Chronic obstructive pulmonary disease	3	Rate	2021	217.185	231.139	201.949
Incidence	158	South Asia	3	Both	22	All ages	509	Chronic obstructive pulmonary disease	3	Rate	2021	204.696	218.29	190.253
Incidence	158	South Asia	1	Male	27	Age-standardized	509	Chronic obstructive pulmonary disease	3	Rate	2021	254.727	269.971	238.623
Incidence	158	South Asia	2	Female	27	Age-standardized	509	Chronic obstructive pulmonary disease	3	Rate	2021	262.108	277.668	245.442
Incidence	158	South Asia	3	Both	27	Age-standardized	509	Chronic obstructive pulmonary disease	3	Rate	2021	258.256	273.757	242.489
Incidence	32	Central Asia	1	Male	22	All ages	509	Chronic obstructive pulmonary disease	1	Number	2021	59459.4	66055.9	53111.6
Incidence	32	Central Asia	2	Female	22	All ages	509	Chronic obstructive pulmonary disease	1	Number	2021	73842.6	82315	66105.1
Incidence	32	Central Asia	3	Both	22	All ages	509	Chronic obstructive pulmonary disease	1	Number	2021	133302	148131	118936
Incidence	32	Central Asia	1	Male	22	All ages	509	Chronic obstructive pulmonary disease	3	Rate	2021	125.1	138.979	111.745
Incidence	32	Central Asia	2	Female	22	All ages	509	Chronic obstructive pulmonary disease	3	Rate	2021	152.948	170.497	136.922
Incidence	32	Central Asia	3	Both	22	All ages	509	Chronic obstructive pulmonary disease	3	Rate	2021	139.133	154.611	124.139
Incidence	32	Central Asia	1	Male	27	Age-standardized	509	Chronic obstructive pulmonary disease	3	Rate	2021	172.018	190.11	154.697
Incidence	32	Central Asia	2	Female	27	Age-standardized	509	Chronic obstructive pulmonary disease	3	Rate	2021	163.252	181.954	146.051
Incidence	32	Central Asia	3	Both	27	Age-standardized	509	Chronic obstructive pulmonary disease	3	Rate	2021	166.099	184.127	148.276
Incidence	9	Southeast Asia	1	Male	22	All ages	509	Chronic obstructive pulmonary disease	1	Number	2021	594556	660123	536762
Incidence	9	Southeast Asia	2	Female	22	All ages	509	Chronic obstructive pulmonary disease	1	Number	2021	476194	537737	417878
Incidence	9	Southeast Asia	3	Both	22	All ages	509	Chronic obstructive pulmonary disease	1	Number	2021	1070750	1190856	953956
Incidence	9	Southeast Asia	1	Male	22	All ages	509	Chronic obstructive pulmonary disease	3	Rate	2021	170.101	188.859	153.566
Incidence	9	Southeast Asia	2	Female	22	All ages	509	Chronic obstructive pulmonary disease	3	Rate	2021	136.534	154.18	119.814
Incidence	9	Southeast Asia	3	Both	22	All ages	509	Chronic obstructive pulmonary disease	3	Rate	2021	153.336	170.535	136.61
Incidence	9	Southeast Asia	1	Male	27	Age-standardized	509	Chronic obstructive pulmonary disease	3	Rate	2021	201.007	221.064	181.214
Incidence	9	Southeast Asia	2	Female	27	Age-standardized	509	Chronic obstructive pulmonary disease	3	Rate	2021	139.525	156.751	122.661
Incidence	9	Southeast Asia	3	Both	27	Age-standardized	509	Chronic obstructive pulmonary disease	3	Rate	2021	167.412	185.923	149.521
Incidence	44561	Asia	1	Male	22	All ages	509	Chronic obstructive pulmonary disease	1	Number	2021	5288933	5744380	4839008
Incidence	44561	Asia	2	Female	22	All ages	509	Chronic obstructive pulmonary disease	1	Number	2021	5223910	5689254	4742523
Incidence	44561	Asia	3	Both	22	All ages	509	Chronic obstructive pulmonary disease	1	Number	2021	10512843	11432970	9610006
Incidence	44561	Asia	1	Male	22	All ages	509	Chronic obstructive pulmonary disease	3	Rate	2021	224.751	244.105	205.631
Incidence	44561	Asia	2	Female	22	All ages	509	Chronic obstructive pulmonary disease	3	Rate	2021	230.181	250.685	208.97
Incidence	44561	Asia	3	Both	22	All ages	509	Chronic obstructive pulmonary disease	3	Rate	2021	227.417	247.321	207.886
Incidence	44561	Asia	1	Male	27	Age-standardized	509	Chronic obstructive pulmonary disease	3	Rate	2021	223.776	241.035	206.883
Incidence	44561	Asia	2	Female	27	Age-standardized	509	Chronic obstructive pulmonary disease	3	Rate	2021	199.984	217.154	182.189
Incidence	44561	Asia	3	Both	27	Age-standardized	509	Chronic obstructive pulmonary disease	3	Rate	2021	210.794	227.938	193.52
Incidence	5	East Asia	1	Male	22	All ages	509	Chronic obstructive pulmonary disease	1	Number	2021	2291903	2504020	2085274
Incidence	5	East Asia	2	Female	22	All ages	509	Chronic obstructive pulmonary disease	1	Number	2021	2275368	2504686	2051160
Incidence	5	East Asia	3	Both	22	All ages	509	Chronic obstructive pulmonary disease	1	Number	2021	4567271	5000602	4133512
Incidence	5	East Asia	1	Male	22	All ages	509	Chronic obstructive pulmonary disease	3	Rate	2021	304.406	332.579	276.962
Incidence	5	East Asia	2	Female	22	All ages	509	Chronic obstructive pulmonary disease	3	Rate	2021	316.083	347.939	284.937
Incidence	5	East Asia	3	Both	22	All ages	509	Chronic obstructive pulmonary disease	3	Rate	2021	310.113	339.536	280.661
Incidence	5	East Asia	1	Male	27	Age-standardized	509	Chronic obstructive pulmonary disease	3	Rate	2021	228.17	245.581	210.59
Incidence	5	East Asia	2	Female	27	Age-standardized	509	Chronic obstructive pulmonary disease	3	Rate	2021	203.157	222.81	184.612
Incidence	5	East Asia	3	Both	27	Age-standardized	509	Chronic obstructive pulmonary disease	3	Rate	2021	214.446	233.319	197.243

## Sheet: S4
Table 1 S4 The changes in the incidence rate, mortality rate, and disability-adjusted life years (DALYs) of COPD in Asia from 1990 to 2021.
measure_name	location_id	location_name	sex_id	sex_name	age_id	age_name	cause_id	cause_name	metric_id	metric_name	year_start	year_end	val	upper	lower
Deaths	158	South Asia	1	Male	22	All ages	509	Chronic obstructive pulmonary disease	1	Number	1990	2021	1.20857	1.88843	0.848013
Deaths	158	South Asia	2	Female	22	All ages	509	Chronic obstructive pulmonary disease	1	Number	1990	2021	1.84827	4.00592	1.18907
Deaths	158	South Asia	3	Both	22	All ages	509	Chronic obstructive pulmonary disease	1	Number	1990	2021	1.45486	2.16765	1.07531
Deaths	158	South Asia	1	Male	22	All ages	509	Chronic obstructive pulmonary disease	3	Rate	1990	2021	0.333882	0.744491	0.11612
Deaths	158	South Asia	2	Female	22	All ages	509	Chronic obstructive pulmonary disease	3	Rate	1990	2021	0.651554	1.90265	0.269317
Deaths	158	South Asia	3	Both	22	All ages	509	Chronic obstructive pulmonary disease	3	Rate	1990	2021	0.453601	0.875666	0.228856
Deaths	158	South Asia	1	Male	27	Age-standardized	509	Chronic obstructive pulmonary disease	3	Rate	1990	2021	-0.1261	0.133104	-0.26631
Deaths	158	South Asia	2	Female	27	Age-standardized	509	Chronic obstructive pulmonary disease	3	Rate	1990	2021	-0.06308	0.658533	-0.28436
Deaths	158	South Asia	3	Both	27	Age-standardized	509	Chronic obstructive pulmonary disease	3	Rate	1990	2021	-0.11271	0.148417	-0.2519
Deaths	9	Southeast Asia	1	Male	22	All ages	509	Chronic obstructive pulmonary disease	1	Number	1990	2021	0.970302	1.60953	0.634861
Deaths	9	Southeast Asia	2	Female	22	All ages	509	Chronic obstructive pulmonary disease	1	Number	1990	2021	0.817972	2.22542	0.387867
Deaths	9	Southeast Asia	3	Both	22	All ages	509	Chronic obstructive pulmonary disease	1	Number	1990	2021	0.914725	1.58871	0.624927
Deaths	9	Southeast Asia	1	Male	22	All ages	509	Chronic obstructive pulmonary disease	3	Rate	1990	2021	0.302883	0.725579	0.081069
Deaths	9	Southeast Asia	2	Female	22	All ages	509	Chronic obstructive pulmonary disease	3	Rate	1990	2021	0.221678	1.16749	-0.06735
Deaths	9	Southeast Asia	3	Both	22	All ages	509	Chronic obstructive pulmonary disease	3	Rate	1990	2021	0.276402	0.725699	0.083216
Deaths	9	Southeast Asia	1	Male	27	Age-standardized	509	Chronic obstructive pulmonary disease	3	Rate	1990	2021	-0.24561	-0.00085	-0.37403
Deaths	9	Southeast Asia	2	Female	27	Age-standardized	509	Chronic obstructive pulmonary disease	3	Rate	1990	2021	-0.33063	0.179858	-0.48845
Deaths	9	Southeast Asia	3	Both	27	Age-standardized	509	Chronic obstructive pulmonary disease	3	Rate	1990	2021	-0.28314	-0.02653	-0.39043
Deaths	5	East Asia	1	Male	22	All ages	509	Chronic obstructive pulmonary disease	1	Number	1990	2021	0.184397	0.530182	-0.15033
Deaths	5	East Asia	2	Female	22	All ages	509	Chronic obstructive pulmonary disease	1	Number	1990	2021	-0.09003	0.363501	-0.36294
Deaths	5	East Asia	3	Both	22	All ages	509	Chronic obstructive pulmonary disease	1	Number	1990	2021	0.051888	0.323988	-0.16546
Deaths	5	East Asia	1	Male	22	All ages	509	Chronic obstructive pulmonary disease	3	Rate	1990	2021	-0.01358	0.274404	-0.29236
Deaths	5	East Asia	2	Female	22	All ages	509	Chronic obstructive pulmonary disease	3	Rate	1990	2021	-0.25371	0.118248	-0.47753
Deaths	5	East Asia	3	Both	22	All ages	509	Chronic obstructive pulmonary disease	3	Rate	1990	2021	-0.13048	0.094448	-0.31014
Deaths	5	East Asia	1	Male	27	Age-standardized	509	Chronic obstructive pulmonary disease	3	Rate	1990	2021	-0.62598	-0.53324	-0.72638
Deaths	5	East Asia	2	Female	27	Age-standardized	509	Chronic obstructive pulmonary disease	3	Rate	1990	2021	-0.73037	-0.60351	-0.81122
Deaths	5	East Asia	3	Both	27	Age-standardized	509	Chronic obstructive pulmonary disease	3	Rate	1990	2021	-0.67951	-0.60198	-0.74238
Deaths	44561	Asia	1	Male	22	All ages	509	Chronic obstructive pulmonary disease	1	Number	1990	2021	0.553673	0.8526	0.258319
Deaths	44561	Asia	2	Female	22	All ages	509	Chronic obstructive pulmonary disease	1	Number	1990	2021	0.405586	0.964823	0.121395
Deaths	44561	Asia	3	Both	22	All ages	509	Chronic obstructive pulmonary disease	1	Number	1990	2021	0.487404	0.776253	0.29701
Deaths	44561	Asia	1	Male	22	All ages	509	Chronic obstructive pulmonary disease	3	Rate	1990	2021	0.074283	0.280975	-0.12994
Deaths	44561	Asia	2	Female	22	All ages	509	Chronic obstructive pulmonary disease	3	Rate	1990	2021	-0.04132	0.34011	-0.23515
Deaths	44561	Asia	3	Both	22	All ages	509	Chronic obstructive pulmonary disease	3	Rate	1990	2021	0.021601	0.219992	-0.10917
Deaths	44561	Asia	1	Male	27	Age-standardized	509	Chronic obstructive pulmonary disease	3	Rate	1990	2021	-0.44623	-0.34676	-0.55085
Deaths	44561	Asia	2	Female	27	Age-standardized	509	Chronic obstructive pulmonary disease	3	Rate	1990	2021	-0.544	-0.37095	-0.63684
Deaths	44561	Asia	3	Both	27	Age-standardized	509	Chronic obstructive pulmonary disease	3	Rate	1990	2021	-0.49674	-0.39843	-0.55913
Deaths	32	Central Asia	1	Male	22	All ages	509	Chronic obstructive pulmonary disease	1	Number	1990	2021	0.033229	0.169727	-0.08546
Deaths	32	Central Asia	2	Female	22	All ages	509	Chronic obstructive pulmonary disease	1	Number	1990	2021	-0.1511	-0.02365	-0.24973
Deaths	32	Central Asia	3	Both	22	All ages	509	Chronic obstructive pulmonary disease	1	Number	1990	2021	-0.0488	0.056504	-0.14315
Deaths	32	Central Asia	1	Male	22	All ages	509	Chronic obstructive pulmonary disease	3	Rate	1990	2021	-0.26238	-0.16494	-0.34711
Deaths	32	Central Asia	2	Female	22	All ages	509	Chronic obstructive pulmonary disease	3	Rate	1990	2021	-0.3779	-0.28449	-0.45018
Deaths	32	Central Asia	3	Both	22	All ages	509	Chronic obstructive pulmonary disease	3	Rate	1990	2021	-0.31186	-0.23568	-0.38012
Deaths	32	Central Asia	1	Male	27	Age-standardized	509	Chronic obstructive pulmonary disease	3	Rate	1990	2021	-0.42615	-0.35559	-0.48748
Deaths	32	Central Asia	2	Female	27	Age-standardized	509	Chronic obstructive pulmonary disease	3	Rate	1990	2021	-0.43807	-0.35879	-0.50157
Deaths	32	Central Asia	3	Both	27	Age-standardized	509	Chronic obstructive pulmonary disease	3	Rate	1990	2021	-0.41435	-0.35228	-0.46905
DALYs (Disability-Adjusted Life Years)	158	South Asia	1	Male	22	All ages	509	Chronic obstructive pulmonary disease	1	Number	1990	2021	1.03137	1.56938	0.724424
DALYs (Disability-Adjusted Life Years)	158	South Asia	2	Female	22	All ages	509	Chronic obstructive pulmonary disease	1	Number	1990	2021	1.49543	2.9507	1.01157
DALYs (Disability-Adjusted Life Years)	158	South Asia	3	Both	22	All ages	509	Chronic obstructive pulmonary disease	1	Number	1990	2021	1.21302	1.76818	0.906971
DALYs (Disability-Adjusted Life Years)	158	South Asia	1	Male	22	All ages	509	Chronic obstructive pulmonary disease	3	Rate	1990	2021	0.226861	0.551795	0.041478
DALYs (Disability-Adjusted Life Years)	158	South Asia	2	Female	22	All ages	509	Chronic obstructive pulmonary disease	3	Rate	1990	2021	0.446962	1.29079	0.166396
DALYs (Disability-Adjusted Life Years)	158	South Asia	3	Both	22	All ages	509	Chronic obstructive pulmonary disease	3	Rate	1990	2021	0.310401	0.639128	0.129178
DALYs (Disability-Adjusted Life Years)	158	South Asia	1	Male	27	Age-standardized	509	Chronic obstructive pulmonary disease	3	Rate	1990	2021	-0.16498	0.055608	-0.29157
DALYs (Disability-Adjusted Life Years)	158	South Asia	2	Female	27	Age-standardized	509	Chronic obstructive pulmonary disease	3	Rate	1990	2021	-0.11658	0.406713	-0.29385
DALYs (Disability-Adjusted Life Years)	158	South Asia	3	Both	27	Age-standardized	509	Chronic obstructive pulmonary disease	3	Rate	1990	2021	-0.15468	0.058561	-0.27096
DALYs (Disability-Adjusted Life Years)	9	Southeast Asia	1	Male	22	All ages	509	Chronic obstructive pulmonary disease	1	Number	1990	2021	0.929019	1.48822	0.636258
DALYs (Disability-Adjusted Life Years)	9	Southeast Asia	2	Female	22	All ages	509	Chronic obstructive pulmonary disease	1	Number	1990	2021	0.749516	1.80049	0.389006
DALYs (Disability-Adjusted Life Years)	9	Southeast Asia	3	Both	22	All ages	509	Chronic obstructive pulmonary disease	1	Number	1990	2021	0.862757	1.41514	0.610285
DALYs (Disability-Adjusted Life Years)	9	Southeast Asia	1	Male	22	All ages	509	Chronic obstructive pulmonary disease	3	Rate	1990	2021	0.275584	0.645359	0.081993
DALYs (Disability-Adjusted Life Years)	9	Southeast Asia	2	Female	22	All ages	509	Chronic obstructive pulmonary disease	3	Rate	1990	2021	0.175675	0.88193	-0.06659
DALYs (Disability-Adjusted Life Years)	9	Southeast Asia	3	Both	22	All ages	509	Chronic obstructive pulmonary disease	3	Rate	1990	2021	0.241759	0.609989	0.073455
DALYs (Disability-Adjusted Life Years)	9	Southeast Asia	1	Male	27	Age-standardized	509	Chronic obstructive pulmonary disease	3	Rate	1990	2021	-0.23934	-0.02634	-0.35307
DALYs (Disability-Adjusted Life Years)	9	Southeast Asia	2	Female	27	Age-standardized	509	Chronic obstructive pulmonary disease	3	Rate	1990	2021	-0.3143	0.100648	-0.45887
DALYs (Disability-Adjusted Life Years)	9	Southeast Asia	3	Both	27	Age-standardized	509	Chronic obstructive pulmonary disease	3	Rate	1990	2021	-0.27148	-0.04979	-0.36759
DALYs (Disability-Adjusted Life Years)	44561	Asia	1	Male	22	All ages	509	Chronic obstructive pulmonary disease	1	Number	1990	2021	0.409095	0.651081	0.174786
DALYs (Disability-Adjusted Life Years)	44561	Asia	2	Female	22	All ages	509	Chronic obstructive pulmonary disease	1	Number	1990	2021	0.352521	0.813528	0.128418
DALYs (Disability-Adjusted Life Years)	44561	Asia	3	Both	22	All ages	509	Chronic obstructive pulmonary disease	1	Number	1990	2021	0.384376	0.622739	0.232334
DALYs (Disability-Adjusted Life Years)	44561	Asia	1	Male	22	All ages	509	Chronic obstructive pulmonary disease	3	Rate	1990	2021	-0.02568	0.141636	-0.1877
DALYs (Disability-Adjusted Life Years)	44561	Asia	2	Female	22	All ages	509	Chronic obstructive pulmonary disease	3	Rate	1990	2021	-0.07751	0.23692	-0.23036
DALYs (Disability-Adjusted Life Years)	44561	Asia	3	Both	22	All ages	509	Chronic obstructive pulmonary disease	3	Rate	1990	2021	-0.04916	0.114553	-0.15359
DALYs (Disability-Adjusted Life Years)	44561	Asia	1	Male	27	Age-standardized	509	Chronic obstructive pulmonary disease	3	Rate	1990	2021	-0.4549	-0.36313	-0.54727
DALYs (Disability-Adjusted Life Years)	44561	Asia	2	Female	27	Age-standardized	509	Chronic obstructive pulmonary disease	3	Rate	1990	2021	-0.50795	-0.34636	-0.58983
DALYs (Disability-Adjusted Life Years)	44561	Asia	3	Both	27	Age-standardized	509	Chronic obstructive pulmonary disease	3	Rate	1990	2021	-0.48212	-0.39306	-0.5385
DALYs (Disability-Adjusted Life Years)	5	East Asia	1	Male	22	All ages	509	Chronic obstructive pulmonary disease	1	Number	1990	2021	-0.01753	0.268248	-0.29265
DALYs (Disability-Adjusted Life Years)	5	East Asia	2	Female	22	All ages	509	Chronic obstructive pulmonary disease	1	Number	1990	2021	-0.15319	0.218448	-0.3663
DALYs (Disability-Adjusted Life Years)	5	East Asia	3	Both	22	All ages	509	Chronic obstructive pulmonary disease	1	Number	1990	2021	-0.08107	0.137534	-0.25495
DALYs (Disability-Adjusted Life Years)	5	East Asia	1	Male	22	All ages	509	Chronic obstructive pulmonary disease	3	Rate	1990	2021	-0.18176	0.056253	-0.41088
DALYs (Disability-Adjusted Life Years)	5	East Asia	2	Female	22	All ages	509	Chronic obstructive pulmonary disease	3	Rate	1990	2021	-0.30551	-0.00071	-0.48028
DALYs (Disability-Adjusted Life Years)	5	East Asia	3	Both	22	All ages	509	Chronic obstructive pulmonary disease	3	Rate	1990	2021	-0.24038	-0.05968	-0.38412
DALYs (Disability-Adjusted Life Years)	5	East Asia	1	Male	27	Age-standardized	509	Chronic obstructive pulmonary disease	3	Rate	1990	2021	-0.64361	-0.55029	-0.73722
DALYs (Disability-Adjusted Life Years)	5	East Asia	2	Female	27	Age-standardized	509	Chronic obstructive pulmonary disease	3	Rate	1990	2021	-0.70774	-0.58488	-0.7805
DALYs (Disability-Adjusted Life Years)	5	East Asia	3	Both	27	Age-standardized	509	Chronic obstructive pulmonary disease	3	Rate	1990	2021	-0.67622	-0.60316	-0.73555
DALYs (Disability-Adjusted Life Years)	32	Central Asia	1	Male	22	All ages	509	Chronic obstructive pulmonary disease	1	Number	1990	2021	0.067224	0.202472	-0.05302
DALYs (Disability-Adjusted Life Years)	32	Central Asia	2	Female	22	All ages	509	Chronic obstructive pulmonary disease	1	Number	1990	2021	-0.02156	0.110074	-0.11566
DALYs (Disability-Adjusted Life Years)	32	Central Asia	3	Both	22	All ages	509	Chronic obstructive pulmonary disease	1	Number	1990	2021	0.028942	0.142335	-0.06806
DALYs (Disability-Adjusted Life Years)	32	Central Asia	1	Male	22	All ages	509	Chronic obstructive pulmonary disease	3	Rate	1990	2021	-0.23812	-0.14156	-0.32396
DALYs (Disability-Adjusted Life Years)	32	Central Asia	2	Female	22	All ages	509	Chronic obstructive pulmonary disease	3	Rate	1990	2021	-0.28297	-0.1865	-0.35193
DALYs (Disability-Adjusted Life Years)	32	Central Asia	3	Both	22	All ages	509	Chronic obstructive pulmonary disease	3	Rate	1990	2021	-0.25562	-0.17359	-0.3258
DALYs (Disability-Adjusted Life Years)	32	Central Asia	1	Male	27	Age-standardized	509	Chronic obstructive pulmonary disease	3	Rate	1990	2021	-0.41632	-0.34799	-0.47931
DALYs (Disability-Adjusted Life Years)	32	Central Asia	2	Female	27	Age-standardized	509	Chronic obstructive pulmonary disease	3	Rate	1990	2021	-0.37776	-0.2988	-0.43651
DALYs (Disability-Adjusted Life Years)	32	Central Asia	3	Both	27	Age-standardized	509	Chronic obstructive pulmonary disease	3	Rate	1990	2021	-0.38568	-0.32336	-0.44128
Incidence	9	Southeast Asia	1	Male	22	All ages	509	Chronic obstructive pulmonary disease	1	Number	1990	2021	1.47241	1.55123	1.38836
Incidence	9	Southeast Asia	2	Female	22	All ages	509	Chronic obstructive pulmonary disease	1	Number	1990	2021	1.40453	1.48967	1.31622
Incidence	9	Southeast Asia	3	Both	22	All ages	509	Chronic obstructive pulmonary disease	1	Number	1990	2021	1.44176	1.51278	1.36024
Incidence	9	Southeast Asia	1	Male	22	All ages	509	Chronic obstructive pulmonary disease	3	Rate	1990	2021	0.634909	0.687031	0.579327
Incidence	9	Southeast Asia	2	Female	22	All ages	509	Chronic obstructive pulmonary disease	3	Rate	1990	2021	0.615847	0.67306	0.556498
Incidence	9	Southeast Asia	3	Both	22	All ages	509	Chronic obstructive pulmonary disease	3	Rate	1990	2021	0.627736	0.675084	0.573395
Incidence	9	Southeast Asia	1	Male	27	Age-standardized	509	Chronic obstructive pulmonary disease	3	Rate	1990	2021	-0.00029	0.033002	-0.03196
Incidence	9	Southeast Asia	2	Female	27	Age-standardized	509	Chronic obstructive pulmonary disease	3	Rate	1990	2021	-0.01272	0.016823	-0.0415
Incidence	9	Southeast Asia	3	Both	27	Age-standardized	509	Chronic obstructive pulmonary disease	3	Rate	1990	2021	-0.00582	0.019752	-0.03169
Incidence	32	Central Asia	1	Male	22	All ages	509	Chronic obstructive pulmonary disease	1	Number	1990	2021	0.701351	0.78907	0.595903
Incidence	32	Central Asia	2	Female	22	All ages	509	Chronic obstructive pulmonary disease	1	Number	1990	2021	0.656436	0.753069	0.557947
Incidence	32	Central Asia	3	Both	22	All ages	509	Chronic obstructive pulmonary disease	1	Number	1990	2021	0.676174	0.749655	0.591518
Incidence	32	Central Asia	1	Male	22	All ages	509	Chronic obstructive pulmonary disease	3	Rate	1990	2021	0.214583	0.277205	0.139304
Incidence	32	Central Asia	2	Female	22	All ages	509	Chronic obstructive pulmonary disease	3	Rate	1990	2021	0.213896	0.284712	0.14172
Incidence	32	Central Asia	3	Both	22	All ages	509	Chronic obstructive pulmonary disease	3	Rate	1990	2021	0.21261	0.265769	0.151366
Incidence	32	Central Asia	1	Male	27	Age-standardized	509	Chronic obstructive pulmonary disease	3	Rate	1990	2021	-0.03883	0.014202	-0.08995
Incidence	32	Central Asia	2	Female	27	Age-standardized	509	Chronic obstructive pulmonary disease	3	Rate	1990	2021	0.030358	0.098092	-0.02866
Incidence	32	Central Asia	3	Both	27	Age-standardized	509	Chronic obstructive pulmonary disease	3	Rate	1990	2021	0.003292	0.055491	-0.04443
Incidence	44561	Asia	1	Male	22	All ages	509	Chronic obstructive pulmonary disease	1	Number	1990	2021	1.24511	1.31852	1.14821
Incidence	44561	Asia	2	Female	22	All ages	509	Chronic obstructive pulmonary disease	1	Number	1990	2021	1.26021	1.33845	1.16529
Incidence	44561	Asia	3	Both	22	All ages	509	Chronic obstructive pulmonary disease	1	Number	1990	2021	1.25259	1.32527	1.15549
Incidence	44561	Asia	1	Male	22	All ages	509	Chronic obstructive pulmonary disease	3	Rate	1990	2021	0.552376	0.603136	0.485374
Incidence	44561	Asia	2	Female	22	All ages	509	Chronic obstructive pulmonary disease	3	Rate	1990	2021	0.541583	0.594944	0.476838
Incidence	44561	Asia	3	Both	22	All ages	509	Chronic obstructive pulmonary disease	3	Rate	1990	2021	0.547157	0.597077	0.480464
Incidence	44561	Asia	1	Male	27	Age-standardized	509	Chronic obstructive pulmonary disease	3	Rate	1990	2021	-0.08723	-0.06075	-0.12038
Incidence	44561	Asia	2	Female	27	Age-standardized	509	Chronic obstructive pulmonary disease	3	Rate	1990	2021	-0.11011	-0.08253	-0.14495
Incidence	44561	Asia	3	Both	27	Age-standardized	509	Chronic obstructive pulmonary disease	3	Rate	1990	2021	-0.09886	-0.07307	-0.13287
Incidence	5	East Asia	1	Male	22	All ages	509	Chronic obstructive pulmonary disease	1	Number	1990	2021	1.12678	1.2338	0.98373
Incidence	5	East Asia	2	Female	22	All ages	509	Chronic obstructive pulmonary disease	1	Number	1990	2021	0.975257	1.09927	0.830374
Incidence	5	East Asia	3	Both	22	All ages	509	Chronic obstructive pulmonary disease	1	Number	1990	2021	1.04849	1.1623	0.910293
Incidence	5	East Asia	1	Male	22	All ages	509	Chronic obstructive pulmonary disease	3	Rate	1990	2021	0.77128	0.860406	0.652139
Incidence	5	East Asia	2	Female	22	All ages	509	Chronic obstructive pulmonary disease	3	Rate	1990	2021	0.619967	0.721675	0.501144
Incidence	5	East Asia	3	Both	22	All ages	509	Chronic obstructive pulmonary disease	3	Rate	1990	2021	0.693348	0.787425	0.579105
Incidence	5	East Asia	1	Male	27	Age-standardized	509	Chronic obstructive pulmonary disease	3	Rate	1990	2021	-0.16128	-0.12674	-0.20696
Incidence	5	East Asia	2	Female	27	Age-standardized	509	Chronic obstructive pulmonary disease	3	Rate	1990	2021	-0.24175	-0.19947	-0.29173
Incidence	5	East Asia	3	Both	27	Age-standardized	509	Chronic obstructive pulmonary disease	3	Rate	1990	2021	-0.20357	-0.16768	-0.25284
Incidence	158	South Asia	1	Male	22	All ages	509	Chronic obstructive pulmonary disease	1	Number	1990	2021	1.29527	1.36161	1.22769
Incidence	158	South Asia	2	Female	22	All ages	509	Chronic obstructive pulmonary disease	1	Number	1990	2021	1.65308	1.69957	1.58502
Incidence	158	South Asia	3	Both	22	All ages	509	Chronic obstructive pulmonary disease	1	Number	1990	2021	1.4685	1.52066	1.40487
Incidence	158	South Asia	1	Male	22	All ages	509	Chronic obstructive pulmonary disease	3	Rate	1990	2021	0.386244	0.42631	0.345431
Incidence	158	South Asia	2	Female	22	All ages	509	Chronic obstructive pulmonary disease	3	Rate	1990	2021	0.538372	0.565327	0.498908
Incidence	158	South Asia	3	Both	22	All ages	509	Chronic obstructive pulmonary disease	3	Rate	1990	2021	0.461676	0.492562	0.423999
Incidence	158	South Asia	1	Male	27	Age-standardized	509	Chronic obstructive pulmonary disease	3	Rate	1990	2021	-0.057	-0.03188	-0.08239
Incidence	158	South Asia	2	Female	27	Age-standardized	509	Chronic obstructive pulmonary disease	3	Rate	1990	2021	-0.03944	-0.02418	-0.06077
Incidence	158	South Asia	3	Both	27	Age-standardized	509	Chronic obstructive pulmonary disease	3	Rate	1990	2021	-0.04822	-0.02896	-0.07019

## Sheet: S5
Table 1 S5 COPD mortality rate in 48 Asian countries in 2021.
Deaths	164	Nepal	3	Both	27	Age-standardized	509	Chronic obstructive pulmonary disease	3	Rate	2021	146.127	182.463	116.66
Deaths	163	India	3	Both	27	Age-standardized	509	Chronic obstructive pulmonary disease	3	Rate	2021	108.389	122.393	94.7256
Deaths	7	North Korea	3	Both	27	Age-standardized	509	Chronic obstructive pulmonary disease	3	Rate	2021	107.677	156.696	80.6667
Deaths	15	Myanmar	3	Both	27	Age-standardized	509	Chronic obstructive pulmonary disease	3	Rate	2021	104.533	126.424	82.4583
Deaths	162	Bhutan	3	Both	27	Age-standardized	509	Chronic obstructive pulmonary disease	3	Rate	2021	87.6126	116.372	67.0884
Deaths	165	Pakistan	3	Both	27	Age-standardized	509	Chronic obstructive pulmonary disease	3	Rate	2021	73.7993	94.5533	60.0407
Deaths	6	China	3	Both	27	Age-standardized	509	Chronic obstructive pulmonary disease	3	Rate	2021	73.2314	86.8524	59.7322
Deaths	161	Bangladesh	3	Both	27	Age-standardized	509	Chronic obstructive pulmonary disease	3	Rate	2021	59.6489	77.2161	46.234
Deaths	12	Laos	3	Both	27	Age-standardized	509	Chronic obstructive pulmonary disease	3	Rate	2021	56.403	72.8114	41.3394
Deaths	19	Timor-Leste	3	Both	27	Age-standardized	509	Chronic obstructive pulmonary disease	3	Rate	2021	51.3506	65.4342	38.5238
Deaths	160	Afghanistan	3	Both	27	Age-standardized	509	Chronic obstructive pulmonary disease	3	Rate	2021	50.6008	65.598	36.1328
Deaths	11	Indonesia	3	Both	27	Age-standardized	509	Chronic obstructive pulmonary disease	3	Rate	2021	49.5311	58.227	40.9489
Deaths	36	Kazakhstan	3	Both	27	Age-standardized	509	Chronic obstructive pulmonary disease	3	Rate	2021	46.6822	54.0992	40.2807
Deaths	17	Sri Lanka	3	Both	27	Age-standardized	509	Chronic obstructive pulmonary disease	3	Rate	2021	46.206	60.7208	31.8163
Deaths	10	Cambodia	3	Both	27	Age-standardized	509	Chronic obstructive pulmonary disease	3	Rate	2021	46.0799	55.6964	36.7426
Deaths	20	Vietnam	3	Both	27	Age-standardized	509	Chronic obstructive pulmonary disease	3	Rate	2021	43.9643	54.1731	35.1108
Deaths	155	Turkey	3	Both	27	Age-standardized	509	Chronic obstructive pulmonary disease	3	Rate	2021	40.7722	48.5167	33.8641
Deaths	140	Bahrain	3	Both	27	Age-standardized	509	Chronic obstructive pulmonary disease	3	Rate	2021	35.3666	40.5153	30.0577
Deaths	14	Maldives	3	Both	27	Age-standardized	509	Chronic obstructive pulmonary disease	3	Rate	2021	35.0054	42.4853	29.0693
Deaths	66	Brunei	3	Both	27	Age-standardized	509	Chronic obstructive pulmonary disease	3	Rate	2021	33.635	39.8311	28.5458
Deaths	16	Philippines	3	Both	27	Age-standardized	509	Chronic obstructive pulmonary disease	3	Rate	2021	32.8148	38.2439	27.6912
Deaths	157	Yemen	3	Both	27	Age-standardized	509	Chronic obstructive pulmonary disease	3	Rate	2021	31.2568	41.2689	22.6583
Deaths	39	Tajikistan	3	Both	27	Age-standardized	509	Chronic obstructive pulmonary disease	3	Rate	2021	29.0991	38.8855	20.803
Deaths	13	Malaysia	3	Both	27	Age-standardized	509	Chronic obstructive pulmonary disease	3	Rate	2021	28.8453	32.8974	24.898
Deaths	37	Kyrgyzstan	3	Both	27	Age-standardized	509	Chronic obstructive pulmonary disease	3	Rate	2021	28.2471	32.6707	23.8821
Deaths	156	United Arab Emirates	3	Both	27	Age-standardized	509	Chronic obstructive pulmonary disease	3	Rate	2021	26.2578	33.4563	18.3032
Deaths	153	Syria	3	Both	27	Age-standardized	509	Chronic obstructive pulmonary disease	3	Rate	2021	25.8161	31.7261	20.3513
Deaths	186	Seychelles	3	Both	27	Age-standardized	509	Chronic obstructive pulmonary disease	3	Rate	2021	23.6846	27.4621	20.4043
Deaths	152	Saudi Arabia	3	Both	27	Age-standardized	509	Chronic obstructive pulmonary disease	3	Rate	2021	22.6868	27.3117	18.5511
Deaths	38	Mongolia	3	Both	27	Age-standardized	509	Chronic obstructive pulmonary disease	3	Rate	2021	20.5868	24.885	16.4324
Deaths	18	Thailand	3	Both	27	Age-standardized	509	Chronic obstructive pulmonary disease	3	Rate	2021	19.8001	24.9732	15.222
Deaths	146	Lebanon	3	Both	27	Age-standardized	509	Chronic obstructive pulmonary disease	3	Rate	2021	19.6471	23.5148	16.16
Deaths	142	Iran	3	Both	27	Age-standardized	509	Chronic obstructive pulmonary disease	3	Rate	2021	17.4412	19.1968	15.0618
Deaths	8	Taiwan (Province of China)	3	Both	27	Age-standardized	509	Chronic obstructive pulmonary disease	3	Rate	2021	17.0596	18.72	14.8709
Deaths	183	Mauritius	3	Both	27	Age-standardized	509	Chronic obstructive pulmonary disease	3	Rate	2021	16.8815	18.0165	15.3229
Deaths	149	Palestine	3	Both	27	Age-standardized	509	Chronic obstructive pulmonary disease	3	Rate	2021	16.3418	19.8933	13.9106
Deaths	34	Azerbaijan	3	Both	27	Age-standardized	509	Chronic obstructive pulmonary disease	3	Rate	2021	15.3446	19.7683	12.0778
Deaths	33	Armenia	3	Both	27	Age-standardized	509	Chronic obstructive pulmonary disease	3	Rate	2021	15.1875	17.3341	13.08
Deaths	150	Oman	3	Both	27	Age-standardized	509	Chronic obstructive pulmonary disease	3	Rate	2021	14.2445	17.6256	11.6154
Deaths	151	Qatar	3	Both	27	Age-standardized	509	Chronic obstructive pulmonary disease	3	Rate	2021	12.786	15.9383	9.99384
Deaths	68	South Korea	3	Both	27	Age-standardized	509	Chronic obstructive pulmonary disease	3	Rate	2021	12.0301	14.78	9.73792
Deaths	143	Iraq	3	Both	27	Age-standardized	509	Chronic obstructive pulmonary disease	3	Rate	2021	11.4432	14.4067	8.66679
Deaths	40	Turkmenistan	3	Both	27	Age-standardized	509	Chronic obstructive pulmonary disease	3	Rate	2021	11.0462	13.735	8.75785
Deaths	35	Georgia	3	Both	27	Age-standardized	509	Chronic obstructive pulmonary disease	3	Rate	2021	10.971	12.7398	9.36436
Deaths	144	Jordan	3	Both	27	Age-standardized	509	Chronic obstructive pulmonary disease	3	Rate	2021	10.733	13.2006	8.55408
Deaths	41	Uzbekistan	3	Both	27	Age-standardized	509	Chronic obstructive pulmonary disease	3	Rate	2021	8.75084	10.2801	7.46096
Deaths	69	Singapore	3	Both	27	Age-standardized	509	Chronic obstructive pulmonary disease	3	Rate	2021	5.93144	6.3971	5.18532
Deaths	67	Japan	3	Both	27	Age-standardized	509	Chronic obstructive pulmonary disease	3	Rate	2021	5.83526	6.32972	4.92579
Deaths	145	Kuwait	3	Both	27	Age-standardized	509	Chronic obstructive pulmonary disease	3	Rate	2021	2.74168	3.27824	2.23574

## Sheet: S6
Table 1 S6 COPD disability-adjusted life years (DALYs) in 48 Asian countries in 2021.
DALYs (Disability-Adjusted Life Years)	164	Nepal	3	Both	27	Age-standardized	509	Chronic obstructive pulmonary disease	3	Rate	2021	2836.01	3485.04	2275.31
DALYs (Disability-Adjusted Life Years)	163	India	3	Both	27	Age-standardized	509	Chronic obstructive pulmonary disease	3	Rate	2021	2171.16	2422.39	1953.69
DALYs (Disability-Adjusted Life Years)	7	North Korea	3	Both	27	Age-standardized	509	Chronic obstructive pulmonary disease	3	Rate	2021	1968.19	2612.25	1500.48
DALYs (Disability-Adjusted Life Years)	15	Myanmar	3	Both	27	Age-standardized	509	Chronic obstructive pulmonary disease	3	Rate	2021	1958.92	2354	1604.09
DALYs (Disability-Adjusted Life Years)	162	Bhutan	3	Both	27	Age-standardized	509	Chronic obstructive pulmonary disease	3	Rate	2021	1678.89	2166	1317.32
DALYs (Disability-Adjusted Life Years)	165	Pakistan	3	Both	27	Age-standardized	509	Chronic obstructive pulmonary disease	3	Rate	2021	1541.67	1855.86	1287.52
DALYs (Disability-Adjusted Life Years)	161	Bangladesh	3	Both	27	Age-standardized	509	Chronic obstructive pulmonary disease	3	Rate	2021	1301.68	1612.22	1050.53
DALYs (Disability-Adjusted Life Years)	6	China	3	Both	27	Age-standardized	509	Chronic obstructive pulmonary disease	3	Rate	2021	1227.66	1442.54	1048.45
DALYs (Disability-Adjusted Life Years)	12	Laos	3	Both	27	Age-standardized	509	Chronic obstructive pulmonary disease	3	Rate	2021	1176.83	1502.07	892.838
DALYs (Disability-Adjusted Life Years)	160	Afghanistan	3	Both	27	Age-standardized	509	Chronic obstructive pulmonary disease	3	Rate	2021	1155.17	1480.07	875.127
DALYs (Disability-Adjusted Life Years)	19	Timor-Leste	3	Both	27	Age-standardized	509	Chronic obstructive pulmonary disease	3	Rate	2021	1047.94	1288.82	814.393
DALYs (Disability-Adjusted Life Years)	11	Indonesia	3	Both	27	Age-standardized	509	Chronic obstructive pulmonary disease	3	Rate	2021	1040.41	1216	874.716
DALYs (Disability-Adjusted Life Years)	36	Kazakhstan	3	Both	27	Age-standardized	509	Chronic obstructive pulmonary disease	3	Rate	2021	1023.13	1171.56	889.04
DALYs (Disability-Adjusted Life Years)	10	Cambodia	3	Both	27	Age-standardized	509	Chronic obstructive pulmonary disease	3	Rate	2021	935.155	1124.75	771.66
DALYs (Disability-Adjusted Life Years)	17	Sri Lanka	3	Both	27	Age-standardized	509	Chronic obstructive pulmonary disease	3	Rate	2021	864.191	1103.11	631.534
DALYs (Disability-Adjusted Life Years)	20	Vietnam	3	Both	27	Age-standardized	509	Chronic obstructive pulmonary disease	3	Rate	2021	863.316	1024.54	702.771
DALYs (Disability-Adjusted Life Years)	155	Turkey	3	Both	27	Age-standardized	509	Chronic obstructive pulmonary disease	3	Rate	2021	850.187	983.51	727.989
DALYs (Disability-Adjusted Life Years)	16	Philippines	3	Both	27	Age-standardized	509	Chronic obstructive pulmonary disease	3	Rate	2021	807.046	923.783	707.125
DALYs (Disability-Adjusted Life Years)	157	Yemen	3	Both	27	Age-standardized	509	Chronic obstructive pulmonary disease	3	Rate	2021	730.213	920.095	567.092
DALYs (Disability-Adjusted Life Years)	14	Maldives	3	Both	27	Age-standardized	509	Chronic obstructive pulmonary disease	3	Rate	2021	696.347	814.592	597.416
DALYs (Disability-Adjusted Life Years)	140	Bahrain	3	Both	27	Age-standardized	509	Chronic obstructive pulmonary disease	3	Rate	2021	681.457	765.261	591.167
DALYs (Disability-Adjusted Life Years)	39	Tajikistan	3	Both	27	Age-standardized	509	Chronic obstructive pulmonary disease	3	Rate	2021	637.121	826.721	492.25
DALYs (Disability-Adjusted Life Years)	13	Malaysia	3	Both	27	Age-standardized	509	Chronic obstructive pulmonary disease	3	Rate	2021	628.091	692.065	565.395
DALYs (Disability-Adjusted Life Years)	37	Kyrgyzstan	3	Both	27	Age-standardized	509	Chronic obstructive pulmonary disease	3	Rate	2021	627.152	714.78	542.738
DALYs (Disability-Adjusted Life Years)	153	Syria	3	Both	27	Age-standardized	509	Chronic obstructive pulmonary disease	3	Rate	2021	605.906	740.443	498.55
DALYs (Disability-Adjusted Life Years)	66	Brunei	3	Both	27	Age-standardized	509	Chronic obstructive pulmonary disease	3	Rate	2021	595.815	686.731	519.538
DALYs (Disability-Adjusted Life Years)	156	United Arab Emirates	3	Both	27	Age-standardized	509	Chronic obstructive pulmonary disease	3	Rate	2021	594.58	713.852	488.748
DALYs (Disability-Adjusted Life Years)	186	Seychelles	3	Both	27	Age-standardized	509	Chronic obstructive pulmonary disease	3	Rate	2021	538.592	600.256	475.565
DALYs (Disability-Adjusted Life Years)	152	Saudi Arabia	3	Both	27	Age-standardized	509	Chronic obstructive pulmonary disease	3	Rate	2021	533.08	618.801	452.572
DALYs (Disability-Adjusted Life Years)	146	Lebanon	3	Both	27	Age-standardized	509	Chronic obstructive pulmonary disease	3	Rate	2021	477.836	545.887	416.89
DALYs (Disability-Adjusted Life Years)	18	Thailand	3	Both	27	Age-standardized	509	Chronic obstructive pulmonary disease	3	Rate	2021	461.065	559.878	381.239
DALYs (Disability-Adjusted Life Years)	38	Mongolia	3	Both	27	Age-standardized	509	Chronic obstructive pulmonary disease	3	Rate	2021	453.683	532.25	376.577
DALYs (Disability-Adjusted Life Years)	142	Iran	3	Both	27	Age-standardized	509	Chronic obstructive pulmonary disease	3	Rate	2021	424.079	462.239	383.162
DALYs (Disability-Adjusted Life Years)	149	Palestine	3	Both	27	Age-standardized	509	Chronic obstructive pulmonary disease	3	Rate	2021	397.174	454.726	353.228
DALYs (Disability-Adjusted Life Years)	183	Mauritius	3	Both	27	Age-standardized	509	Chronic obstructive pulmonary disease	3	Rate	2021	388.622	420.104	361.01
DALYs (Disability-Adjusted Life Years)	150	Oman	3	Both	27	Age-standardized	509	Chronic obstructive pulmonary disease	3	Rate	2021	380.908	458.218	326.154
DALYs (Disability-Adjusted Life Years)	34	Azerbaijan	3	Both	27	Age-standardized	509	Chronic obstructive pulmonary disease	3	Rate	2021	374.489	479.566	309.173
DALYs (Disability-Adjusted Life Years)	8	Taiwan (Province of China)	3	Both	27	Age-standardized	509	Chronic obstructive pulmonary disease	3	Rate	2021	343.417	377.543	311.474
DALYs (Disability-Adjusted Life Years)	33	Armenia	3	Both	27	Age-standardized	509	Chronic obstructive pulmonary disease	3	Rate	2021	339.938	379.962	305.427
DALYs (Disability-Adjusted Life Years)	151	Qatar	3	Both	27	Age-standardized	509	Chronic obstructive pulmonary disease	3	Rate	2021	336.209	395.646	287.543
DALYs (Disability-Adjusted Life Years)	143	Iraq	3	Both	27	Age-standardized	509	Chronic obstructive pulmonary disease	3	Rate	2021	320.728	381.127	262.885
DALYs (Disability-Adjusted Life Years)	144	Jordan	3	Both	27	Age-standardized	509	Chronic obstructive pulmonary disease	3	Rate	2021	311.007	360.785	266.392
DALYs (Disability-Adjusted Life Years)	40	Turkmenistan	3	Both	27	Age-standardized	509	Chronic obstructive pulmonary disease	3	Rate	2021	307.786	369.498	254.461
DALYs (Disability-Adjusted Life Years)	35	Georgia	3	Both	27	Age-standardized	509	Chronic obstructive pulmonary disease	3	Rate	2021	295.546	333.875	261.427
DALYs (Disability-Adjusted Life Years)	68	South Korea	3	Both	27	Age-standardized	509	Chronic obstructive pulmonary disease	3	Rate	2021	289.133	335.698	251.749
DALYs (Disability-Adjusted Life Years)	41	Uzbekistan	3	Both	27	Age-standardized	509	Chronic obstructive pulmonary disease	3	Rate	2021	238.394	271.828	206.478
DALYs (Disability-Adjusted Life Years)	145	Kuwait	3	Both	27	Age-standardized	509	Chronic obstructive pulmonary disease	3	Rate	2021	160.456	185.653	138.494
DALYs (Disability-Adjusted Life Years)	67	Japan	3	Both	27	Age-standardized	509	Chronic obstructive pulmonary disease	3	Rate	2021	155.76	174.263	137.623
DALYs (Disability-Adjusted Life Years)	69	Singapore	3	Both	27	Age-standardized	509	Chronic obstructive pulmonary disease	3	Rate	2021	146.48	161.671	131.419

## Sheet: S7
Table 1 S7 COPD Incidence rate in 48 Asian countries in 2021.
Incidence	164	Nepal	3	Both	27	Age-standardized	509	Chronic obstructive pulmonary disease	3	Rate	2021	310.578	319.697	300.583
Incidence	163	India	3	Both	27	Age-standardized	509	Chronic obstructive pulmonary disease	3	Rate	2021	262.455	277.477	246.139
Incidence	7	North Korea	3	Both	27	Age-standardized	509	Chronic obstructive pulmonary disease	3	Rate	2021	254.392	271.665	237.391
Incidence	162	Bhutan	3	Both	27	Age-standardized	509	Chronic obstructive pulmonary disease	3	Rate	2021	250.125	268.976	231.404
Incidence	161	Bangladesh	3	Both	27	Age-standardized	509	Chronic obstructive pulmonary disease	3	Rate	2021	238.939	258.355	220.711
Incidence	15	Myanmar	3	Both	27	Age-standardized	509	Chronic obstructive pulmonary disease	3	Rate	2021	234.81	253.657	216.932
Incidence	165	Pakistan	3	Both	27	Age-standardized	509	Chronic obstructive pulmonary disease	3	Rate	2021	231.913	251.503	212.015
Incidence	155	Turkey	3	Both	27	Age-standardized	509	Chronic obstructive pulmonary disease	3	Rate	2021	225.786	245.781	204.979
Incidence	6	China	3	Both	27	Age-standardized	509	Chronic obstructive pulmonary disease	3	Rate	2021	215.62	234.903	198
Incidence	36	Kazakhstan	3	Both	27	Age-standardized	509	Chronic obstructive pulmonary disease	3	Rate	2021	212.033	233.31	192.05
Incidence	37	Kyrgyzstan	3	Both	27	Age-standardized	509	Chronic obstructive pulmonary disease	3	Rate	2021	199.5	221.228	176.649
Incidence	140	Bahrain	3	Both	27	Age-standardized	509	Chronic obstructive pulmonary disease	3	Rate	2021	196.153	218.151	175.39
Incidence	39	Tajikistan	3	Both	27	Age-standardized	509	Chronic obstructive pulmonary disease	3	Rate	2021	190.962	214.661	168.77
Incidence	12	Laos	3	Both	27	Age-standardized	509	Chronic obstructive pulmonary disease	3	Rate	2021	189.441	208.927	170.323
Incidence	156	United Arab Emirates	3	Both	27	Age-standardized	509	Chronic obstructive pulmonary disease	3	Rate	2021	188.422	211.984	167.22
Incidence	160	Afghanistan	3	Both	27	Age-standardized	509	Chronic obstructive pulmonary disease	3	Rate	2021	187.875	210.805	165.878
Incidence	19	Timor-Leste	3	Both	27	Age-standardized	509	Chronic obstructive pulmonary disease	3	Rate	2021	185.175	204.546	166.534
Incidence	33	Armenia	3	Both	27	Age-standardized	509	Chronic obstructive pulmonary disease	3	Rate	2021	181.25	201.417	159.714
Incidence	20	Vietnam	3	Both	27	Age-standardized	509	Chronic obstructive pulmonary disease	3	Rate	2021	179.639	199.164	158.581
Incidence	157	Yemen	3	Both	27	Age-standardized	509	Chronic obstructive pulmonary disease	3	Rate	2021	179.167	203.529	155.115
Incidence	14	Maldives	3	Both	27	Age-standardized	509	Chronic obstructive pulmonary disease	3	Rate	2021	178.888	199.559	159.643
Incidence	151	Qatar	3	Both	27	Age-standardized	509	Chronic obstructive pulmonary disease	3	Rate	2021	176.265	195.954	156.203
Incidence	11	Indonesia	3	Both	27	Age-standardized	509	Chronic obstructive pulmonary disease	3	Rate	2021	176.007	196.117	155.464
Incidence	153	Syria	3	Both	27	Age-standardized	509	Chronic obstructive pulmonary disease	3	Rate	2021	173.58	195.221	153.476
Incidence	146	Lebanon	3	Both	27	Age-standardized	509	Chronic obstructive pulmonary disease	3	Rate	2021	172.934	196.329	149.4
Incidence	150	Oman	3	Both	27	Age-standardized	509	Chronic obstructive pulmonary disease	3	Rate	2021	171.742	196.066	150.363
Incidence	68	South Korea	3	Both	27	Age-standardized	509	Chronic obstructive pulmonary disease	3	Rate	2021	170.306	186.704	155.139
Incidence	10	Cambodia	3	Both	27	Age-standardized	509	Chronic obstructive pulmonary disease	3	Rate	2021	169.071	190.248	149.908
Incidence	16	Philippines	3	Both	27	Age-standardized	509	Chronic obstructive pulmonary disease	3	Rate	2021	165.778	185.649	145.918
Incidence	34	Azerbaijan	3	Both	27	Age-standardized	509	Chronic obstructive pulmonary disease	3	Rate	2021	165.76	188.065	143.966
Incidence	66	Brunei	3	Both	27	Age-standardized	509	Chronic obstructive pulmonary disease	3	Rate	2021	161.147	177.409	144.391
Incidence	38	Mongolia	3	Both	27	Age-standardized	509	Chronic obstructive pulmonary disease	3	Rate	2021	159.077	181.613	139.78
Incidence	149	Palestine	3	Both	27	Age-standardized	509	Chronic obstructive pulmonary disease	3	Rate	2021	153.14	173.714	135.602
Incidence	142	Iran	3	Both	27	Age-standardized	509	Chronic obstructive pulmonary disease	3	Rate	2021	152.049	172.904	132.285
Incidence	144	Jordan	3	Both	27	Age-standardized	509	Chronic obstructive pulmonary disease	3	Rate	2021	150.5	171.443	129.675
Incidence	152	Saudi Arabia	3	Both	27	Age-standardized	509	Chronic obstructive pulmonary disease	3	Rate	2021	148.563	169.908	128.949
Incidence	17	Sri Lanka	3	Both	27	Age-standardized	509	Chronic obstructive pulmonary disease	3	Rate	2021	146.564	167.262	127.476
Incidence	35	Georgia	3	Both	27	Age-standardized	509	Chronic obstructive pulmonary disease	3	Rate	2021	144.781	165.117	124.601
Incidence	145	Kuwait	3	Both	27	Age-standardized	509	Chronic obstructive pulmonary disease	3	Rate	2021	141.093	162.587	121.989
Incidence	186	Seychelles	3	Both	27	Age-standardized	509	Chronic obstructive pulmonary disease	3	Rate	2021	138.131	156.826	120.914
Incidence	13	Malaysia	3	Both	27	Age-standardized	509	Chronic obstructive pulmonary disease	3	Rate	2021	137.346	155.981	120.054
Incidence	143	Iraq	3	Both	27	Age-standardized	509	Chronic obstructive pulmonary disease	3	Rate	2021	137.161	159.212	119.058
Incidence	41	Uzbekistan	3	Both	27	Age-standardized	509	Chronic obstructive pulmonary disease	3	Rate	2021	133.167	150.87	115.144
Incidence	18	Thailand	3	Both	27	Age-standardized	509	Chronic obstructive pulmonary disease	3	Rate	2021	125.474	143.166	107.461
Incidence	183	Mauritius	3	Both	27	Age-standardized	509	Chronic obstructive pulmonary disease	3	Rate	2021	123.864	138.12	109.972
Incidence	8	Taiwan (Province of China)	3	Both	27	Age-standardized	509	Chronic obstructive pulmonary disease	3	Rate	2021	123.69	140.574	110.02
Incidence	40	Turkmenistan	3	Both	27	Age-standardized	509	Chronic obstructive pulmonary disease	3	Rate	2021	112.223	127.754	97.0171
Incidence	67	Japan	3	Both	27	Age-standardized	509	Chronic obstructive pulmonary disease	3	Rate	2021	108.236	126.112	92.187
Incidence	69	Singapore	3	Both	27	Age-standardized	509	Chronic obstructive pulmonary disease	3	Rate	2021	79.1999	91.9548	68.4441

## Sheet: S8
Table 1 S8 The changes in the incidence rate, mortality rate, and disability-adjusted life years (DALYs) of COPD in 48 Asian countries from 1990 to 2021.
measure_name	location_id	location_name	sex_id	sex_name	age_id	age_name	cause_id	cause_name	metric_id	metric_name	year_start	year_end	val	upper	lower
Deaths	160	Afghanistan	3	Both	27	Age-standardized	509	Chronic obstructive pulmonary disease	3	Rate	1990	2021	-0.186765	0.406791	-0.425639
Deaths	161	Bangladesh	3	Both	27	Age-standardized	509	Chronic obstructive pulmonary disease	3	Rate	1990	2021	-0.414859	-0.233432	-0.553191
Deaths	162	Bhutan	3	Both	27	Age-standardized	509	Chronic obstructive pulmonary disease	3	Rate	1990	2021	-0.222705	0.215927	-0.437876
Deaths	163	India	3	Both	27	Age-standardized	509	Chronic obstructive pulmonary disease	3	Rate	1990	2021	-0.0946682	0.192787	-0.25482
Deaths	164	Nepal	3	Both	27	Age-standardized	509	Chronic obstructive pulmonary disease	3	Rate	1990	2021	-0.170303	0.178706	-0.377331
Deaths	165	Pakistan	3	Both	27	Age-standardized	509	Chronic obstructive pulmonary disease	3	Rate	1990	2021	-0.121162	0.239997	-0.317105
Deaths	7	Democratic People's Republic of Korea	3	Both	27	Age-standardized	509	Chronic obstructive pulmonary disease	3	Rate	1990	2021	-0.318681	-0.12608	-0.471665
Deaths	186	Seychelles	3	Both	27	Age-standardized	509	Chronic obstructive pulmonary disease	3	Rate	1990	2021	-0.329103	-0.201945	-0.420983
Deaths	140	Bahrain	3	Both	27	Age-standardized	509	Chronic obstructive pulmonary disease	3	Rate	1990	2021	-0.446387	-0.347501	-0.546241
Deaths	17	Sri Lanka	3	Both	27	Age-standardized	509	Chronic obstructive pulmonary disease	3	Rate	1990	2021	-0.399248	-0.137584	-0.581134
Deaths	18	Thailand	3	Both	27	Age-standardized	509	Chronic obstructive pulmonary disease	3	Rate	1990	2021	-0.640868	-0.519859	-0.73207
Deaths	37	Kyrgyzstan	3	Both	27	Age-standardized	509	Chronic obstructive pulmonary disease	3	Rate	1990	2021	-0.704099	-0.65346	-0.750811
Deaths	19	Timor-Leste	3	Both	27	Age-standardized	509	Chronic obstructive pulmonary disease	3	Rate	1990	2021	-0.159112	0.179106	-0.392846
Deaths	151	Qatar	3	Both	27	Age-standardized	509	Chronic obstructive pulmonary disease	3	Rate	1990	2021	-0.565119	-0.420451	-0.669691
Deaths	20	Viet Nam	3	Both	27	Age-standardized	509	Chronic obstructive pulmonary disease	3	Rate	1990	2021	-0.190123	0.26283	-0.416649
Deaths	8	Taiwan (Province of China)	3	Both	27	Age-standardized	509	Chronic obstructive pulmonary disease	3	Rate	1990	2021	-0.41035	-0.356784	-0.465029
Deaths	66	Brunei Darussalam	3	Both	27	Age-standardized	509	Chronic obstructive pulmonary disease	3	Rate	1990	2021	-0.472516	-0.337873	-0.577658
Deaths	34	Azerbaijan	3	Both	27	Age-standardized	509	Chronic obstructive pulmonary disease	3	Rate	1990	2021	-0.482525	-0.295877	-0.612971
Deaths	14	Maldives	3	Both	27	Age-standardized	509	Chronic obstructive pulmonary disease	3	Rate	1990	2021	-0.618879	-0.378887	-0.713482
Deaths	35	Georgia	3	Both	27	Age-standardized	509	Chronic obstructive pulmonary disease	3	Rate	1990	2021	0.116333	0.370488	-0.0878104
Deaths	36	Kazakhstan	3	Both	27	Age-standardized	509	Chronic obstructive pulmonary disease	3	Rate	1990	2021	0.0321707	0.24069	-0.135361
Deaths	38	Mongolia	3	Both	27	Age-standardized	509	Chronic obstructive pulmonary disease	3	Rate	1990	2021	-0.491197	-0.290611	-0.615366
Deaths	152	Saudi Arabia	3	Both	27	Age-standardized	509	Chronic obstructive pulmonary disease	3	Rate	1990	2021	-0.327748	-0.00498587	-0.495923
Deaths	10	Cambodia	3	Both	27	Age-standardized	509	Chronic obstructive pulmonary disease	3	Rate	1990	2021	-0.126151	0.290119	-0.353095
Deaths	183	Mauritius	3	Both	27	Age-standardized	509	Chronic obstructive pulmonary disease	3	Rate	1990	2021	-0.495842	-0.456082	-0.534333
Deaths	39	Tajikistan	3	Both	27	Age-standardized	509	Chronic obstructive pulmonary disease	3	Rate	1990	2021	-0.399343	-0.166535	-0.585416
Deaths	40	Turkmenistan	3	Both	27	Age-standardized	509	Chronic obstructive pulmonary disease	3	Rate	1990	2021	-0.712725	-0.638428	-0.771843
Deaths	41	Uzbekistan	3	Both	27	Age-standardized	509	Chronic obstructive pulmonary disease	3	Rate	1990	2021	-0.650926	-0.567677	-0.716681
Deaths	142	Iran (Islamic Republic of)	3	Both	27	Age-standardized	509	Chronic obstructive pulmonary disease	3	Rate	1990	2021	-0.169893	0.0736241	-0.303241
Deaths	143	Iraq	3	Both	27	Age-standardized	509	Chronic obstructive pulmonary disease	3	Rate	1990	2021	-0.0574551	0.364978	-0.33009
Deaths	144	Jordan	3	Both	27	Age-standardized	509	Chronic obstructive pulmonary disease	3	Rate	1990	2021	-0.494453	-0.320982	-0.635947
Deaths	67	Japan	3	Both	27	Age-standardized	509	Chronic obstructive pulmonary disease	3	Rate	1990	2021	-0.523186	-0.503451	-0.551844
Deaths	145	Kuwait	3	Both	27	Age-standardized	509	Chronic obstructive pulmonary disease	3	Rate	1990	2021	-0.539249	-0.448072	-0.618392
Deaths	146	Lebanon	3	Both	27	Age-standardized	509	Chronic obstructive pulmonary disease	3	Rate	1990	2021	-0.373738	0.0212463	-0.549433
Deaths	149	Palestine	3	Both	27	Age-standardized	509	Chronic obstructive pulmonary disease	3	Rate	1990	2021	-0.413823	-0.171297	-0.548479
Deaths	150	Oman	3	Both	27	Age-standardized	509	Chronic obstructive pulmonary disease	3	Rate	1990	2021	-0.234834	0.151814	-0.44159
Deaths	153	Syrian Arab Republic	3	Both	27	Age-standardized	509	Chronic obstructive pulmonary disease	3	Rate	1990	2021	0.00777899	0.497518	-0.307684
Deaths	6	China	3	Both	27	Age-standardized	509	Chronic obstructive pulmonary disease	3	Rate	1990	2021	-0.684042	-0.604917	-0.747699
Deaths	11	Indonesia	3	Both	27	Age-standardized	509	Chronic obstructive pulmonary disease	3	Rate	1990	2021	-0.0655327	0.425543	-0.269358
Deaths	33	Armenia	3	Both	27	Age-standardized	509	Chronic obstructive pulmonary disease	3	Rate	1990	2021	-0.649244	-0.599252	-0.690147
Deaths	15	Myanmar	3	Both	27	Age-standardized	509	Chronic obstructive pulmonary disease	3	Rate	1990	2021	-0.228722	0.0941384	-0.423208
Deaths	12	Lao People's Democratic Republic	3	Both	27	Age-standardized	509	Chronic obstructive pulmonary disease	3	Rate	1990	2021	-0.349186	-0.0730734	-0.524254
Deaths	13	Malaysia	3	Both	27	Age-standardized	509	Chronic obstructive pulmonary disease	3	Rate	1990	2021	-0.308745	-0.165068	-0.453295
Deaths	155	Turkey	3	Both	27	Age-standardized	509	Chronic obstructive pulmonary disease	3	Rate	1990	2021	-0.29138	-0.0309347	-0.442684
Deaths	68	Republic of Korea	3	Both	27	Age-standardized	509	Chronic obstructive pulmonary disease	3	Rate	1990	2021	-0.581322	-0.412645	-0.668055
Deaths	16	Philippines	3	Both	27	Age-standardized	509	Chronic obstructive pulmonary disease	3	Rate	1990	2021	-0.295567	-0.149897	-0.421512
Deaths	156	United Arab Emirates	3	Both	27	Age-standardized	509	Chronic obstructive pulmonary disease	3	Rate	1990	2021	-0.310123	-0.0932507	-0.506747
Deaths	157	Yemen	3	Both	27	Age-standardized	509	Chronic obstructive pulmonary disease	3	Rate	1990	2021	-0.178603	0.329643	-0.424881
Deaths	69	Singapore	3	Both	27	Age-standardized	509	Chronic obstructive pulmonary disease	3	Rate	1990	2021	-0.854575	-0.843991	-0.867998
DALYs (Disability-Adjusted Life Years)	39	Tajikistan	3	Both	27	Age-standardized	509	Chronic obstructive pulmonary disease	3	Rate	1990	2021	-0.401065	-0.207937	-0.542923
DALYs (Disability-Adjusted Life Years)	41	Uzbekistan	3	Both	27	Age-standardized	509	Chronic obstructive pulmonary disease	3	Rate	1990	2021	-0.591606	-0.51561	-0.65352
DALYs (Disability-Adjusted Life Years)	142	Iran (Islamic Republic of)	3	Both	27	Age-standardized	509	Chronic obstructive pulmonary disease	3	Rate	1990	2021	-0.113781	0.0815978	-0.234823
DALYs (Disability-Adjusted Life Years)	69	Singapore	3	Both	27	Age-standardized	509	Chronic obstructive pulmonary disease	3	Rate	1990	2021	-0.809801	-0.7923	-0.826311
DALYs (Disability-Adjusted Life Years)	34	Azerbaijan	3	Both	27	Age-standardized	509	Chronic obstructive pulmonary disease	3	Rate	1990	2021	-0.435386	-0.261131	-0.559114
DALYs (Disability-Adjusted Life Years)	157	Yemen	3	Both	27	Age-standardized	509	Chronic obstructive pulmonary disease	3	Rate	1990	2021	-0.193265	0.176817	-0.400615
DALYs (Disability-Adjusted Life Years)	10	Cambodia	3	Both	27	Age-standardized	509	Chronic obstructive pulmonary disease	3	Rate	1990	2021	-0.164101	0.156483	-0.353943
DALYs (Disability-Adjusted Life Years)	40	Turkmenistan	3	Both	27	Age-standardized	509	Chronic obstructive pulmonary disease	3	Rate	1990	2021	-0.630722	-0.545457	-0.69571
DALYs (Disability-Adjusted Life Years)	14	Maldives	3	Both	27	Age-standardized	509	Chronic obstructive pulmonary disease	3	Rate	1990	2021	-0.630182	-0.41253	-0.714157
DALYs (Disability-Adjusted Life Years)	146	Lebanon	3	Both	27	Age-standardized	509	Chronic obstructive pulmonary disease	3	Rate	1990	2021	-0.317518	-0.0301143	-0.469328
DALYs (Disability-Adjusted Life Years)	160	Afghanistan	3	Both	27	Age-standardized	509	Chronic obstructive pulmonary disease	3	Rate	1990	2021	-0.190289	0.332614	-0.415739
DALYs (Disability-Adjusted Life Years)	164	Nepal	3	Both	27	Age-standardized	509	Chronic obstructive pulmonary disease	3	Rate	1990	2021	-0.214675	0.103036	-0.403
DALYs (Disability-Adjusted Life Years)	66	Brunei Darussalam	3	Both	27	Age-standardized	509	Chronic obstructive pulmonary disease	3	Rate	1990	2021	-0.477798	-0.359695	-0.565482
DALYs (Disability-Adjusted Life Years)	144	Jordan	3	Both	27	Age-standardized	509	Chronic obstructive pulmonary disease	3	Rate	1990	2021	-0.391545	-0.252143	-0.519139
DALYs (Disability-Adjusted Life Years)	12	Lao People's Democratic Republic	3	Both	27	Age-standardized	509	Chronic obstructive pulmonary disease	3	Rate	1990	2021	-0.368021	-0.117428	-0.528864
DALYs (Disability-Adjusted Life Years)	162	Bhutan	3	Both	27	Age-standardized	509	Chronic obstructive pulmonary disease	3	Rate	1990	2021	-0.292961	0.0347104	-0.47288
DALYs (Disability-Adjusted Life Years)	33	Armenia	3	Both	27	Age-standardized	509	Chronic obstructive pulmonary disease	3	Rate	1990	2021	-0.629962	-0.587905	-0.667335
DALYs (Disability-Adjusted Life Years)	15	Myanmar	3	Both	27	Age-standardized	509	Chronic obstructive pulmonary disease	3	Rate	1990	2021	-0.277314	-0.00268294	-0.450738
DALYs (Disability-Adjusted Life Years)	163	India	3	Both	27	Age-standardized	509	Chronic obstructive pulmonary disease	3	Rate	1990	2021	-0.134597	0.101407	-0.266999
DALYs (Disability-Adjusted Life Years)	19	Timor-Leste	3	Both	27	Age-standardized	509	Chronic obstructive pulmonary disease	3	Rate	1990	2021	-0.170116	0.140573	-0.377355
DALYs (Disability-Adjusted Life Years)	150	Oman	3	Both	27	Age-standardized	509	Chronic obstructive pulmonary disease	3	Rate	1990	2021	-0.220218	0.0607781	-0.380171
DALYs (Disability-Adjusted Life Years)	151	Qatar	3	Both	27	Age-standardized	509	Chronic obstructive pulmonary disease	3	Rate	1990	2021	-0.445152	-0.32006	-0.549934
DALYs (Disability-Adjusted Life Years)	7	Democratic People's Republic of Korea	3	Both	27	Age-standardized	509	Chronic obstructive pulmonary disease	3	Rate	1990	2021	-0.296893	-0.10199	-0.449569
DALYs (Disability-Adjusted Life Years)	149	Palestine	3	Both	27	Age-standardized	509	Chronic obstructive pulmonary disease	3	Rate	1990	2021	-0.325024	-0.125445	-0.45291
DALYs (Disability-Adjusted Life Years)	152	Saudi Arabia	3	Both	27	Age-standardized	509	Chronic obstructive pulmonary disease	3	Rate	1990	2021	-0.233799	0.0749056	-0.415429
DALYs (Disability-Adjusted Life Years)	18	Thailand	3	Both	27	Age-standardized	509	Chronic obstructive pulmonary disease	3	Rate	1990	2021	-0.60897	-0.505165	-0.690033
DALYs (Disability-Adjusted Life Years)	17	Sri Lanka	3	Both	27	Age-standardized	509	Chronic obstructive pulmonary disease	3	Rate	1990	2021	-0.395021	-0.157824	-0.557834
DALYs (Disability-Adjusted Life Years)	155	Turkey	3	Both	27	Age-standardized	509	Chronic obstructive pulmonary disease	3	Rate	1990	2021	-0.291489	-0.0865203	-0.425048
DALYs (Disability-Adjusted Life Years)	20	Viet Nam	3	Both	27	Age-standardized	509	Chronic obstructive pulmonary disease	3	Rate	1990	2021	-0.181475	0.20312	-0.381644
DALYs (Disability-Adjusted Life Years)	35	Georgia	3	Both	27	Age-standardized	509	Chronic obstructive pulmonary disease	3	Rate	1990	2021	0.164581	0.358278	0.00279316
DALYs (Disability-Adjusted Life Years)	165	Pakistan	3	Both	27	Age-standardized	509	Chronic obstructive pulmonary disease	3	Rate	1990	2021	-0.135826	0.130818	-0.302307
DALYs (Disability-Adjusted Life Years)	37	Kyrgyzstan	3	Both	27	Age-standardized	509	Chronic obstructive pulmonary disease	3	Rate	1990	2021	-0.682791	-0.631097	-0.727548
DALYs (Disability-Adjusted Life Years)	156	United Arab Emirates	3	Both	27	Age-standardized	509	Chronic obstructive pulmonary disease	3	Rate	1990	2021	-0.337411	-0.189841	-0.490554
DALYs (Disability-Adjusted Life Years)	67	Japan	3	Both	27	Age-standardized	509	Chronic obstructive pulmonary disease	3	Rate	1990	2021	-0.431652	-0.406916	-0.454268
DALYs (Disability-Adjusted Life Years)	183	Mauritius	3	Both	27	Age-standardized	509	Chronic obstructive pulmonary disease	3	Rate	1990	2021	-0.431442	-0.393709	-0.46714
DALYs (Disability-Adjusted Life Years)	161	Bangladesh	3	Both	27	Age-standardized	509	Chronic obstructive pulmonary disease	3	Rate	1990	2021	-0.429353	-0.279029	-0.549048
DALYs (Disability-Adjusted Life Years)	143	Iraq	3	Both	27	Age-standardized	509	Chronic obstructive pulmonary disease	3	Rate	1990	2021	-0.0618369	0.229879	-0.256441
DALYs (Disability-Adjusted Life Years)	11	Indonesia	3	Both	27	Age-standardized	509	Chronic obstructive pulmonary disease	3	Rate	1990	2021	-0.0878851	0.31081	-0.265767
DALYs (Disability-Adjusted Life Years)	145	Kuwait	3	Both	27	Age-standardized	509	Chronic obstructive pulmonary disease	3	Rate	1990	2021	-0.209543	-0.136634	-0.282729
DALYs (Disability-Adjusted Life Years)	13	Malaysia	3	Both	27	Age-standardized	509	Chronic obstructive pulmonary disease	3	Rate	1990	2021	-0.298897	-0.176232	-0.42251
DALYs (Disability-Adjusted Life Years)	186	Seychelles	3	Both	27	Age-standardized	509	Chronic obstructive pulmonary disease	3	Rate	1990	2021	-0.303116	-0.21108	-0.384252
DALYs (Disability-Adjusted Life Years)	16	Philippines	3	Both	27	Age-standardized	509	Chronic obstructive pulmonary disease	3	Rate	1990	2021	-0.160528	-0.0256531	-0.284131
DALYs (Disability-Adjusted Life Years)	6	China	3	Both	27	Age-standardized	509	Chronic obstructive pulmonary disease	3	Rate	1990	2021	-0.68134	-0.607841	-0.74216
DALYs (Disability-Adjusted Life Years)	153	Syrian Arab Republic	3	Both	27	Age-standardized	509	Chronic obstructive pulmonary disease	3	Rate	1990	2021	0.000986634	0.424936	-0.260678
DALYs (Disability-Adjusted Life Years)	140	Bahrain	3	Both	27	Age-standardized	509	Chronic obstructive pulmonary disease	3	Rate	1990	2021	-0.433781	-0.342761	-0.522734
DALYs (Disability-Adjusted Life Years)	36	Kazakhstan	3	Both	27	Age-standardized	509	Chronic obstructive pulmonary disease	3	Rate	1990	2021	0.0123677	0.195582	-0.143139
DALYs (Disability-Adjusted Life Years)	8	Taiwan (Province of China)	3	Both	27	Age-standardized	509	Chronic obstructive pulmonary disease	3	Rate	1990	2021	-0.405174	-0.361084	-0.448853
DALYs (Disability-Adjusted Life Years)	68	Republic of Korea	3	Both	27	Age-standardized	509	Chronic obstructive pulmonary disease	3	Rate	1990	2021	-0.470428	-0.340978	-0.547645
DALYs (Disability-Adjusted Life Years)	38	Mongolia	3	Both	27	Age-standardized	509	Chronic obstructive pulmonary disease	3	Rate	1990	2021	-0.465797	-0.292462	-0.587798
Incidence	18	Thailand	3	Both	27	Age-standardized	509	Chronic obstructive pulmonary disease	3	Rate	1990	2021	-0.236478	-0.171946	-0.298746
Incidence	164	Nepal	3	Both	27	Age-standardized	509	Chronic obstructive pulmonary disease	3	Rate	1990	2021	0.000116229	0.037502	-0.0349152
Incidence	146	Lebanon	3	Both	27	Age-standardized	509	Chronic obstructive pulmonary disease	3	Rate	1990	2021	0.354158	0.447301	0.263599
Incidence	149	Palestine	3	Both	27	Age-standardized	509	Chronic obstructive pulmonary disease	3	Rate	1990	2021	0.14568	0.230186	0.0594564
Incidence	13	Malaysia	3	Both	27	Age-standardized	509	Chronic obstructive pulmonary disease	3	Rate	1990	2021	-0.0705539	-0.00104189	-0.138065
Incidence	36	Kazakhstan	3	Both	27	Age-standardized	509	Chronic obstructive pulmonary disease	3	Rate	1990	2021	0.16115	0.263065	0.067477
Incidence	8	Taiwan (Province of China)	3	Both	27	Age-standardized	509	Chronic obstructive pulmonary disease	3	Rate	1990	2021	-0.205888	-0.116094	-0.295828
Incidence	39	Tajikistan	3	Both	27	Age-standardized	509	Chronic obstructive pulmonary disease	3	Rate	1990	2021	0.0837268	0.141742	0.0153267
Incidence	6	China	3	Both	27	Age-standardized	509	Chronic obstructive pulmonary disease	3	Rate	1990	2021	-0.205007	-0.167788	-0.25491
Incidence	162	Bhutan	3	Both	27	Age-standardized	509	Chronic obstructive pulmonary disease	3	Rate	1990	2021	-0.0626652	-0.0271022	-0.100396
Incidence	19	Timor-Leste	3	Both	27	Age-standardized	509	Chronic obstructive pulmonary disease	3	Rate	1990	2021	-0.00969266	0.0516281	-0.0670023
Incidence	34	Azerbaijan	3	Both	27	Age-standardized	509	Chronic obstructive pulmonary disease	3	Rate	1990	2021	0.0668835	0.139647	-0.0177386
Incidence	67	Japan	3	Both	27	Age-standardized	509	Chronic obstructive pulmonary disease	3	Rate	1990	2021	-0.176047	-0.130832	-0.215012
Incidence	157	Yemen	3	Both	27	Age-standardized	509	Chronic obstructive pulmonary disease	3	Rate	1990	2021	0.0260468	0.107822	-0.0650621
Incidence	16	Philippines	3	Both	27	Age-standardized	509	Chronic obstructive pulmonary disease	3	Rate	1990	2021	-0.135487	-0.104154	-0.161629
Incidence	11	Indonesia	3	Both	27	Age-standardized	509	Chronic obstructive pulmonary disease	3	Rate	1990	2021	0.13508	0.167313	0.0993405
Incidence	142	Iran (Islamic Republic of)	3	Both	27	Age-standardized	509	Chronic obstructive pulmonary disease	3	Rate	1990	2021	0.329618	0.391388	0.273995
Incidence	150	Oman	3	Both	27	Age-standardized	509	Chronic obstructive pulmonary disease	3	Rate	1990	2021	0.181313	0.282609	0.0988861
Incidence	37	Kyrgyzstan	3	Both	27	Age-standardized	509	Chronic obstructive pulmonary disease	3	Rate	1990	2021	-0.157338	-0.100822	-0.228031
Incidence	165	Pakistan	3	Both	27	Age-standardized	509	Chronic obstructive pulmonary disease	3	Rate	1990	2021	-0.0482231	-0.0189928	-0.0775192
Incidence	14	Maldives	3	Both	27	Age-standardized	509	Chronic obstructive pulmonary disease	3	Rate	1990	2021	-0.112766	-0.0235374	-0.190171
Incidence	20	Viet Nam	3	Both	27	Age-standardized	509	Chronic obstructive pulmonary disease	3	Rate	1990	2021	0.126387	0.189133	0.0652975
Incidence	68	Republic of Korea	3	Both	27	Age-standardized	509	Chronic obstructive pulmonary disease	3	Rate	1990	2021	0.0127809	0.086001	-0.0542868
Incidence	151	Qatar	3	Both	27	Age-standardized	509	Chronic obstructive pulmonary disease	3	Rate	1990	2021	0.196418	0.27963	0.10737
Incidence	15	Myanmar	3	Both	27	Age-standardized	509	Chronic obstructive pulmonary disease	3	Rate	1990	2021	-0.0265336	0.0428138	-0.0912991
Incidence	10	Cambodia	3	Both	27	Age-standardized	509	Chronic obstructive pulmonary disease	3	Rate	1990	2021	0.0392077	0.120595	-0.0332423
Incidence	66	Brunei Darussalam	3	Both	27	Age-standardized	509	Chronic obstructive pulmonary disease	3	Rate	1990	2021	-0.251912	-0.200047	-0.304741
Incidence	160	Afghanistan	3	Both	27	Age-standardized	509	Chronic obstructive pulmonary disease	3	Rate	1990	2021	0.0990563	0.167981	0.0263322
Incidence	38	Mongolia	3	Both	27	Age-standardized	509	Chronic obstructive pulmonary disease	3	Rate	1990	2021	-0.0198941	0.0582677	-0.0877866
Incidence	69	Singapore	3	Both	27	Age-standardized	509	Chronic obstructive pulmonary disease	3	Rate	1990	2021	-0.369384	-0.268197	-0.447164
Incidence	152	Saudi Arabia	3	Both	27	Age-standardized	509	Chronic obstructive pulmonary disease	3	Rate	1990	2021	0.322255	0.429032	0.225739
Incidence	140	Bahrain	3	Both	27	Age-standardized	509	Chronic obstructive pulmonary disease	3	Rate	1990	2021	0.000841231	0.0730569	-0.0602164
Incidence	186	Seychelles	3	Both	27	Age-standardized	509	Chronic obstructive pulmonary disease	3	Rate	1990	2021	0.138019	0.233094	0.0572994
Incidence	183	Mauritius	3	Both	27	Age-standardized	509	Chronic obstructive pulmonary disease	3	Rate	1990	2021	0.00962424	0.0918154	-0.0586598
Incidence	33	Armenia	3	Both	27	Age-standardized	509	Chronic obstructive pulmonary disease	3	Rate	1990	2021	0.000482487	0.117119	-0.102165
Incidence	144	Jordan	3	Both	27	Age-standardized	509	Chronic obstructive pulmonary disease	3	Rate	1990	2021	0.0849011	0.177278	0.0035618
Incidence	163	India	3	Both	27	Age-standardized	509	Chronic obstructive pulmonary disease	3	Rate	1990	2021	-0.0473304	-0.0271173	-0.0698949
Incidence	40	Turkmenistan	3	Both	27	Age-standardized	509	Chronic obstructive pulmonary disease	3	Rate	1990	2021	-0.24558	-0.141004	-0.333138
Incidence	35	Georgia	3	Both	27	Age-standardized	509	Chronic obstructive pulmonary disease	3	Rate	1990	2021	0.22652	0.401347	0.0637282
Incidence	7	Democratic People's Republic of Korea	3	Both	27	Age-standardized	509	Chronic obstructive pulmonary disease	3	Rate	1990	2021	-0.125512	-0.0769243	-0.16758
Incidence	12	Lao People's Democratic Republic	3	Both	27	Age-standardized	509	Chronic obstructive pulmonary disease	3	Rate	1990	2021	-0.0823947	-0.0300973	-0.134081
Incidence	143	Iraq	3	Both	27	Age-standardized	509	Chronic obstructive pulmonary disease	3	Rate	1990	2021	0.284613	0.394145	0.177379
Incidence	17	Sri Lanka	3	Both	27	Age-standardized	509	Chronic obstructive pulmonary disease	3	Rate	1990	2021	0.0840263	0.166077	0.00995789
Incidence	161	Bangladesh	3	Both	27	Age-standardized	509	Chronic obstructive pulmonary disease	3	Rate	1990	2021	-0.0841148	-0.0400925	-0.125302
Incidence	155	Turkey	3	Both	27	Age-standardized	509	Chronic obstructive pulmonary disease	3	Rate	1990	2021	0.131572	0.216155	0.0594429
Incidence	153	Syrian Arab Republic	3	Both	27	Age-standardized	509	Chronic obstructive pulmonary disease	3	Rate	1990	2021	0.305412	0.40618	0.222866
Incidence	145	Kuwait	3	Both	27	Age-standardized	509	Chronic obstructive pulmonary disease	3	Rate	1990	2021	0.301525	0.426781	0.183413
Incidence	41	Uzbekistan	3	Both	27	Age-standardized	509	Chronic obstructive pulmonary disease	3	Rate	1990	2021	-0.14105	-0.0600503	-0.206975
Incidence	156	United Arab Emirates	3	Both	27	Age-standardized	509	Chronic obstructive pulmonary disease	3	Rate	1990	2021	0.138051	0.21447	0.0689806

## Sheet: S9
Table 1 S9 The AAPC of COPD ASIR, 1990-2021
sex_name	Joinpoint Model	AAPC Index	Start Obs	End Obs	AAPC	AAPC C.I. Low	AAPC C.I. High	Statistically Significant (0=No 1=Yes)	Test Statistic	P-Value
Both	5	Full Range	1990	2021	-0.338	-0.362	-0.314	1	-27.229	0
Female	5	Full Range	1990	2021	-0.375	-0.395	-0.355	1	-36.829	0
Male	5	Full Range	1990	2021	-0.293	-0.318	-0.267	1	-22.581	0

## Sheet: S10
Table 1 S10 The APC of COPD ASIR, 1990-2021
sex_name	Model	Segment	Segment Start	Segment End	APC	APC 95% LCL	APC 95% UCL	APC Significant	Test Statistic	P-Value
Both	5	0	1990	1995	0.005	-0.035	0.044	0	0.249	0.807
Both	5	1	1995	2001	-0.392	-0.431	-0.353	1	-21.372	0
Both	5	2	2001	2009	-0.542	-0.567	-0.517	1	-46.616	0
Both	5	3	2009	2015	-0.252	-0.296	-0.208	1	-12.233	0
Both	5	4	2015	2018	-0.616	-0.818	-0.413	1	-6.458	0
Both	5	5	2018	2021	-0.148	-0.252	-0.044	1	-3.03	0.008
Female	5	0	1990	1995	-0.396	-0.428	-0.364	1	-26.168	0
Female	5	1	1995	2001	-0.585	-0.62	-0.55	1	-35.469	0
Female	5	2	2001	2010	-0.708	-0.726	-0.689	1	-80.896	0
Female	5	3	2010	2015	0.402	0.345	0.459	1	15.145	0
Female	5	4	2015	2019	-0.483	-0.575	-0.39	1	-11.095	0
Female	5	5	2019	2021	0.093	-0.091	0.278	0	1.077	0.299
Male	5	0	1990	1993	0.481	0.379	0.583	1	10.06	0
Male	5	1	1993	1996	0.094	-0.093	0.282	0	1.069	0.302
Male	5	2	1996	2000	-0.21	-0.303	-0.117	1	-4.817	0
Male	5	3	2000	2010	-0.344	-0.362	-0.327	1	-41.985	0
Male	5	4	2010	2018	-0.736	-0.763	-0.709	1	-57.652	0
Male	5	5	2018	2021	-0.201	-0.31	-0.091	1	-3.905	0.001

[truncated: 4 more sheets: S11, S12, S13, S14]
